# Supplementary material for: Patiromer utility as an adjunct treatment in patients needing urgent hyperkalaemia management (PLATINUM): design of a multicentre, randomised, double-blind, placebo-controlled, parallel-group study
Source: PubMed Central journal article supplement — BMJ Open. 2023 Jun 12;13(6):e071311. doi: 10.1136/bmjopen-2022-071311 (PMC10277034; doi:10.1136/bmjopen-2022-071311), 2023-06-12
Supplement: bmjopen-2022-071311.draft_revisions.pdf [file bmjopen-2022-071311.draft_revisions.pdf]

# BMJ Open

BMJ Open is committed to open peer review. As part of this commitment we make the peer review history of every article we publish publicly available.

When an article is published we post the peer reviewers' comments and the authors' responses online. We also post the versions of the paper that were used during peer review. These are the versions that the peer review comments apply to.

The versions of the paper that follow are the versions that were submitted during the peer review process. They are not the versions of record or the final published versions. They should not be cited or distributed as the published version of this manuscript.

BMJ Open is an open access journal and the full, final, typeset and author-corrected version of record of the manuscript is available on our site with no access controls, subscription charges or pay-per-view fees (<http://bmjopen.bmj.com>).

If you have any questions on BMJ Open's open peer review process please email [info.bmjopen@bmj.com](mailto:info.bmjopen@bmj.com)

# BMJ Open

**Patiromer Utility as an Adjunct Treatment in Patients  
Needing Urgent Hyperkalaemia Management (PLATINUM):  
Design of a Multicentre, Randomised, Double-blind,  
Placebo-controlled, Parallel Group Study**

|                               |                                                                                                                                                                                                                                                                                                                                                                                                                                                                                                                                                                                                                                                                                                                                                                                                                                                                                                                                                                                                   |
|-------------------------------|---------------------------------------------------------------------------------------------------------------------------------------------------------------------------------------------------------------------------------------------------------------------------------------------------------------------------------------------------------------------------------------------------------------------------------------------------------------------------------------------------------------------------------------------------------------------------------------------------------------------------------------------------------------------------------------------------------------------------------------------------------------------------------------------------------------------------------------------------------------------------------------------------------------------------------------------------------------------------------------------------|
| Journal:                      | <i>BMJ Open</i>                                                                                                                                                                                                                                                                                                                                                                                                                                                                                                                                                                                                                                                                                                                                                                                                                                                                                                                                                                                   |
| Manuscript ID                 | bmjopen-2022-071311                                                                                                                                                                                                                                                                                                                                                                                                                                                                                                                                                                                                                                                                                                                                                                                                                                                                                                                                                                               |
| Article Type:                 | Protocol                                                                                                                                                                                                                                                                                                                                                                                                                                                                                                                                                                                                                                                                                                                                                                                                                                                                                                                                                                                          |
| Date Submitted by the Author: | 05-Jan-2023                                                                                                                                                                                                                                                                                                                                                                                                                                                                                                                                                                                                                                                                                                                                                                                                                                                                                                                                                                                       |
| Complete List of Authors:     | Rafique, Zubaid ; Baylor College of Medicine, Henry JN Taub Department of Emergency Medicine<br>Budden, Jeffrey; CSL Vifor<br>Quinn, Carol Moreno; CSL Vifor<br>Duanmu, Youyou; Stanford University School of Medicine, Department of Emergency Medicine<br>Safdar, Basmah; Yale University School of Medicine, Emergency Medicine<br>Bischof, Jason; The Ohio State University Wexner Medical Center, Emergency Medicine<br>Driver, Brian; Hennepin County Medical Center, Emergency Medicine<br>Herzog, Charles; Hennepin Healthcare/University of Minnesota, Division of Cardiology, Department of Internal Medicine<br>Weir, Matthew R.; University of Maryland School of Medicine, Department of Medicine<br>Singer, Adam J.; SUNY Stony Brook, Emergency Medicine; Stony Brook University, Department of Emergency Medicine<br>Boone, Stephen; Baylor College of Medicine, Henry JN Taub Department of Emergency Medicine<br>Peacock, Frank; Baylor College of Medicine, Emergency Medicine |
| Keywords:                     | Hypertension < CARDIOLOGY, Clinical trials < THERAPEUTICS, Heart failure < CARDIOLOGY, ACCIDENT & EMERGENCY MEDICINE                                                                                                                                                                                                                                                                                                                                                                                                                                                                                                                                                                                                                                                                                                                                                                                                                                                                              |
|                               |                                                                                                                                                                                                                                                                                                                                                                                                                                                                                                                                                                                                                                                                                                                                                                                                                                                                                                                                                                                                   |

SCHOLARONE™  
Manuscripts

1  
2  
3 **Patiromer Utility as an Adjunct Treatment in Patients Needing Urgent**  
4 **Hyperkalaemia Management (PLATINUM): Design of a Multicentre,**  
5 **Randomised, Double-blind, Placebo-controlled, Parallel Group Study**  
6  
7  
8  
9

10 **Authors:** Zubaid Rafique MD<sup>1</sup>, Jeffrey Budden BS<sup>2</sup>, Carol Moreno Quinn<sup>3</sup>, Youyou  
11 Duanmu MD MPH<sup>4</sup>, Basmah Safdar MD MSc<sup>5</sup>, Jason J. Bischof<sup>6</sup>, Brian E Driver<sup>7</sup>,  
12 Charles A. Herzog<sup>8</sup>, Matthew R. Weir<sup>9</sup>, Adam Singer<sup>10</sup>, Stephen Boone MD<sup>1</sup>, W.  
13 Frank Peacock MD<sup>1</sup>  
14  
15  
16  
17  
18

19 **Affiliations:** <sup>1</sup>Henry JN Taub Department of Emergency Medicine, Baylor College of  
20 Clinical Medicine, Houston, TX, USA. <sup>2</sup>CSL Vifor, Redwood City, CA, USA. <sup>3</sup>CSL  
21 Vifor, Glattbrugg, Switzerland. <sup>4</sup>Department of Emergency Medicine, Stanford  
22 University School of Medicine, Palo Alto, CA, USA. <sup>5</sup>Department of Emergency  
23 Medicine, Yale School of Medicine, New Haven, CT, USA. <sup>6</sup>Department of  
24 Emergency Medicine, The Ohio State University Wexner Medical Center, Columbus,  
25 OH, USA. <sup>7</sup>Department of Emergency Medicine, Hennepin County Medical Center,  
26 Minneapolis, MN, USA. <sup>8</sup>Division of Cardiology, Department of Internal Medicine,  
27 Hennepin Healthcare/University of Minnesota, Minneapolis, MN, USA. <sup>9</sup>Division of  
28 Nephrology, Department of Medicine, University of Maryland School of Medicine,  
29 Baltimore, USA. <sup>10</sup>Department of Emergency Medicine, Stony Brook University  
30 Hospital, Stony Brook, NY, USA.  
31  
32  
33  
34  
35  
36  
37  
38  
39  
40  
41  
42  
43  
44  
45  
46  
47

48 **Corresponding author:** Zubaid Rafique

49 zubaidrafique@gmail.com  
50  
51

52 **Running title (< 50 characters incl. spaces):** Patiromer in hyperkalaemia  
53 (PLATINUM): study design  
54  
55

56 **Target journal:** BMJOpen  
57  
58

59 **Word count:** 2789 words  
60

1  
2  
3 **Number of figures/tables:** 1 table; 3 figures ( $\leq 5$  of each)  
4  
5  
6  
7

8 **Suggested reviewers:** 'Roberto Pecoits-Filho'

9  
10 (Roberto.Pecoits@arborresearch.org), Jon Cole (Jon.Cole@hcmed.org), Edgar

11  
12  
13 Lerma (nephron0@gmail.com), David Wheeler (d.wheeler@ucl.ac.uk)  
14  
15  
16  
17  
18  
19  
20  
21  
22  
23  
24  
25  
26  
27  
28  
29  
30  
31  
32  
33  
34  
35  
36  
37  
38  
39  
40  
41  
42  
43  
44  
45  
46  
47  
48  
49  
50  
51  
52  
53  
54  
55  
56  
57  
58  
59  
60

For peer review only

## Abstract

(299/300 words)

**Introduction:** Hyperkalaemia is common, life-threatening, and often requires emergency department (ED) management, however no standardised ED treatment protocol exists. Common treatments transiently reducing serum potassium ( $K^+$ ) (including albuterol, glucose and insulin) may cause hypoglycaemia. We outline the design and rationale of the Patiromer Utility as an Adjunct Treatment in Patients Needing Urgent Hyperkalaemia Management (PLATINUM) study, which will be the largest ED randomised controlled hyperkalaemia trial ever performed, enabling assessment of a standardised approach to hyperkalaemia management, as well as establishing a new evaluation parameter (net clinical benefit) for acute hyperkalaemia treatment investigations.

**Methods and analysis:** Platinum is a Phase 4, multicentre, randomised, double-blind, placebo-controlled study in participants who present to the ED at approximately 30 US sites. Approximately 300 adult participants with hyperkalaemia ( $K^+ \geq 5.8$  mEq/L) will be enrolled. Participants will be randomised 1:1 to receive glucose (25 g intravenously [IV] <15 minutes before insulin), insulin (5 units IV bolus) and aerosolised albuterol (10 mg over 30 minutes), followed by a single oral dose of either 25.2 g patiromer or placebo, with a second dose of patiromer (8.4 g) or placebo after 24 hours. The primary endpoint is net clinical benefit, defined as the mean change in the number of additional interventions less the mean change in serum  $K^+$ , at hour 6. Secondary endpoints are net clinical benefit at hour 4, proportion of participants without additional  $K^+$ -related medical interventions, number of additional  $K^+$ -related interventions, and proportion of participants with sustained  $K^+$

1  
2  
3 reduction ( $K^+ \leq 5.5$  mEq/L). Safety endpoints are the incidence of adverse events,  
4  
5 and severity of changes in serum  $K^+$  and magnesium.  
6  
7

8 **Ethics and dissemination:** Participants will provide written consent and the local  
9  
10 Institutional Review Board and Ethics Committee provided protocol approval.

11  
12 Primary results will be published in peer reviewed manuscripts promptly following  
13  
14 study completion.  
15  
16

17  
18 **Trial registration:** NCT04443608.  
19  
20

### 21 22 23 **Strengths and limitations of this study**

- 24  
25  
26 • PLATINUM is planned to be the largest emergency department (ED)  
27  
28 randomised controlled hyperkalaemia trial ever performed, with the  
29  
30 opportunity to assess a standardised approach to hyperkalaemia  
31  
32 management, as well as establish a new evaluation parameter (i.e., net  
33  
34 clinical benefit) for acute hyperkalaemia treatment investigations.  
35  
36
- 37  
38 • Limitations include the difficulties of patient recruitment in an ED environment,  
39  
40 and that further studies may be required to assess the benefit of patiromer as  
41  
42 an adjunct treatment to other ED hyperkalaemia therapies (other than the  
43  
44 protocol-specified standard of care).  
45  
46  
47  
48  
49  
50  
51  
52  
53  
54  
55  
56  
57  
58  
59  
60

## Introduction

Hyperkalaemia, generally defined as serum potassium ( $K^+$ )  $>5.5$  mEq/L, is common, can lead to life-threatening cardiac arrhythmias, and frequently affects patients in the emergency department (ED)<sup>1-3</sup>. In 2014, more than 1 million ED visits had an ICD-9 code related to hyperkalaemia<sup>4</sup>, with emergent hyperkalemia likely to rise in parallel with increasing prevalence of hyperkalaemia risk factors<sup>5</sup> (e.g. chronic kidney disease<sup>6,7</sup>, heart failure<sup>8</sup> and hypertension<sup>9</sup>). In addition, many patients have recurrent hyperkalaemia following discharge from the ED<sup>10</sup>. Expert panel recommendations and treatment algorithms for the management of hyperkalaemia<sup>11-14</sup> exist, however there is no standardised US protocol for ED hyperkalaemia management<sup>15</sup>. Common medications currently used to treat hyperkalaemia in the ED, such as nebulised albuterol and intravenous insulin, with or without glucose<sup>11,12,14-24</sup>, often cause adverse events (AEs), such as hypoglycaemia or hyperglycaemia<sup>15-19,25,29</sup>. Additionally, treatments that only shift  $K^+$  into the cell, rather than remove it, frequently result in recurrence of hyperkalaemia 2–3 hours after treatment<sup>41</sup>, particularly in patients undergoing hemodialysis<sup>7</sup>. Repeat treatment to counter hyperkalaemia recurrence then further increases the risk of AEs.

Alternatively, the use of  $K^+$  binders to eliminate  $K^+$  may be a better treatment strategy for emergent hyperkalaemia, although the current evidence lacks evaluation in a large randomised controlled trial<sup>24</sup>. Two small randomised studies (REDUCE and ENERGIZE) have shown promising results by adding either patiomer or sodium zirconium cyclosilicate to insulin and glucose therapy or investigator-designated standard of care, however, these studies were statistically inconclusive<sup>26,27</sup>. Sodium polystyrene sulfonate (SPS) is a historically established treatment for chronic hyperkalaemia, reducing serum  $K^+$  via colonic excretion<sup>28</sup>. However, the onset of

1  
2  
3 action, degree of K<sup>+</sup> lowering, and patient tolerance of SPS are unpredictable <sup>7 29 30</sup>.  
4  
5 Loop diuretics are commonly used in management of acute hyperkalemia; however,  
6  
7 there is a lack of clinical studies to support their use in this setting <sup>2</sup>. Ultimately,  
8  
9 dialysis represents a definitive treatment for hyperkalaemia, however effective  
10  
11 management of hyperkalaemia through dialysis is complex and challenging<sup>7</sup>. Thus,  
12  
13 the new oral K<sup>+</sup> binders with fewer adverse effects, such as patiromer, may offer a  
14  
15 solution for the removal of excess K<sup>+</sup> in hyperkalaemic patients presenting to the ED.  
16  
17 Patiromer is a non-absorbed, oral K<sup>+</sup> binder using sodium-free exchange <sup>31</sup> with  
18  
19 efficacy in the treatment of hyperkalaemia in patients with chronic kidney disease  
20  
21 and heart failure <sup>21 27 32-36</sup> and approval for use in the US <sup>22</sup> and EU <sup>23</sup> for treatment of  
22  
23 hyperkalaemia. Given the variability of hyperkalaemia treatment in the ED <sup>15</sup>, the  
24  
25 challenge of emergent dialysis <sup>7</sup>, and the serious risks of AEs <sup>15-19 2529</sup>, there is a  
26  
27 need for evaluation of novel K<sup>+</sup> binders as additional treatments in the ED that act to  
28  
29 remove excess K<sup>+</sup> <sup>37</sup>, which have fewer AEs.  
30  
31  
32  
33  
34

35  
36 The PLATINUM trial will employ a systematic approach to investigate the use of  
37  
38 patiromer as an adjunct treatment in hyperkalaemic patients presenting to the ED.  
39  
40 The primary objective is to determine if patiromer, as adjunct to intravenous (IV)  
41  
42 insulin, glucose and inhaled beta-agonist therapy, reduces the need for additional  
43  
44 medical interventions for the management of hyperkalaemia. Secondary objectives  
45  
46 are to determine if adjunctive treatment with patiromer results in fewer additional K<sup>+</sup>-  
47  
48 related medical interventions, enables a sustained reduction in K<sup>+</sup> without additional  
49  
50 medical interventions, and leads to a sustained reduction in K<sup>+</sup> 24 hours after ED  
51  
52 discharge.  
53  
54  
55  
56  
57  
58  
59  
60



1  
2  
3 **Methods and analysis**

4  
5  
6 **Study design**

7  
8 This is a Phase 4, multicentre, randomised, double-blind, placebo-controlled, parallel-group study (NCT04443608, **Figure 1**). It is  
9 planned that PLATINUM will enrol approximately 300 participants with hyperkalaemia at about 30 sites in the US (**Figure 2**). The  
10 schedule of assessments is shown in **Table 1**.  
11  
12  
13

14  
15  
16 **Table 1. Assessment schedule during treatment period and follow-up.**

| Procedures                               | Baseline              |               | Treatment Period |               |               | Follow-up                      |                     |                       |
|------------------------------------------|-----------------------|---------------|------------------|---------------|---------------|--------------------------------|---------------------|-----------------------|
|                                          | Assessment 1          | Assessment 2  | Assessment 3     | Assessment 4  | Assessment 5  | Assessment 6/ET                | Assessment 7        | Assessment 8          |
|                                          | Hour 0 <sup>(1)</sup> | Hour 2±15 min | Hour 4±15 min    | Hour 6±15 min | Hour 8±15 min | Hour 10 or EoED <sup>(2)</sup> | Hour 0 +30–48 hours | EoED +14 days +3 days |
| Informed consent                         | X                     |               |                  |               |               |                                |                     |                       |
| Eligibility criteria <sup>(3)</sup>      | X                     |               |                  |               |               |                                |                     |                       |
| IWRS entry                               | X                     |               |                  |               |               |                                |                     |                       |
| Demographics                             | X                     |               |                  |               |               |                                |                     |                       |
| Medical/surgical history                 | X                     |               |                  |               |               |                                |                     |                       |
| Weight, height                           | X                     |               |                  |               |               |                                |                     |                       |
| Vital signs <sup>(4)</sup>               | X                     |               |                  |               |               |                                |                     |                       |
| Electrocardiogram                        | X                     |               | X                |               |               |                                |                     |                       |
| Potassium level <sup>(5)</sup>           | X                     | X             | X                | X             | X             | X                              | X                   |                       |
| Magnesium level                          | X                     |               |                  | X             |               |                                | X                   |                       |
| Pregnancy test (for female participants) | X                     |               |                  |               |               |                                |                     |                       |

|                                                                     |   |                                                                  |   |   |   |                  |   |   |  |
|---------------------------------------------------------------------|---|------------------------------------------------------------------|---|---|---|------------------|---|---|--|
| <b>Adverse events</b>                                               | X | X                                                                | X | X | X | X                | X | X |  |
| <b>Prior medications</b> <sup>(6)</sup>                             | X |                                                                  |   |   |   |                  |   |   |  |
| <b>Concomitant medications</b>                                      | X | X                                                                | X | X | X | X                | X | X |  |
| <b>Randomisation</b>                                                | X |                                                                  |   |   |   |                  |   |   |  |
| <b>Administer study drug</b>                                        | X |                                                                  |   |   |   | X <sup>(7)</sup> |   |   |  |
| <b>Administer standard combination therapy (SCT)</b> <sup>(8)</sup> | X | Potassium-related medical intervention as needed, but prefer SCT |   |   |   |                  |   |   |  |

1 Hour 0 is defined as the time of study drug administration (study drug needs to be administered within 60 mins of verifying eligible serum potassium and administering SCT).

2 EoED defined as discharge from Emergency Department or initiation of dialysis, whichever occurs sooner.

3 Includes verbal check of pregnancy status for female participants. Pregnancy status to be confirmed for female participants via laboratory (blood or urine samples acceptable) at Assessment 1.

4 Blood pressure, heart rate, pulse oximetry, respiratory rate, and temperature.

5 Obtained from the laboratory only, not point of care

6 Up to 72 hours prior to baseline visit.

7 A study drug packet will be given to participants to prepare and take 24 hours after the first dose is administered.

8 SCT is defined as insulin (5 U administered as a bolus), glucose (25 g administered intravenously <15 minutes before the insulin), and aerosolised albuterol (10 mg over 30 minutes) at baseline. Further potassium-related medical interventions, defined as additional administrations of insulin, glucose, or albuterol (or their combination) at any dose, or any other potassium-lowering medication can be initiated and repeated at the discretion of the Investigator at any time; however, SCT is preferred.

EoED, end of Emergency Department; ET, early termination; IWRS, Interactive Web Response System; SCT, standard combination therapy.

1  
2  
3 Participants who are admitted to the ED with hyperkalaemia, provide informed  
4 consent, and satisfy eligibility criteria, will be enrolled and undergo assessment.  
5  
6  
7

8 The treatment period will be from the completion of the baseline assessment until  
9 discharge from the ED or initiation of dialysis, whichever occurs first. The expected  
10 duration of subject participation is 15 days; the treatment period is up to 1 day, and  
11 the follow-up period is 14 days. Participants who prematurely discontinue study drug  
12 will remain in the study to be monitored and assessed. Additional K<sup>+</sup>-related medical  
13 interventions, defined as post-baseline administration of insulin/glucose, with or  
14 without albuterol, or any other K<sup>+</sup>-lowering medication, can be initiated and repeated  
15 at any time during the treatment period at the discretion of the investigator or treating  
16 team. However, a standard combination therapy (SCT) is encouraged if additional K<sup>+</sup>  
17 related interventions are needed.  
18  
19  
20  
21  
22  
23  
24  
25  
26  
27  
28  
29  
30

### 31 **Ethics and dissemination**

32 This study will be conducted according to the principles of the World Medical  
33 Association's Declaration of Helsinki <sup>38</sup>, and the amended International Council for  
34 Harmonisation Good Clinical Practice guidelines <sup>39</sup>. The informed consent form used  
35 for the study will comply with the Declaration of Helsinki, federal regulations, and  
36 International Council for Harmonisation guidelines; and will be approved by the  
37 appropriate Institutional Review Board, Ethics Committee or Independent Ethics  
38 Committee prior to use. Participants will provide consent in writing prior to study  
39 entry. The protocol and any protocol amendments will be approved by the local  
40 Institutional Review Board, Ethics Committee or Independent Ethics Committee.  
41  
42  
43  
44  
45  
46  
47  
48  
49  
50  
51  
52  
53  
54  
55  
56 Primary results will be published in peer reviewed manuscripts promptly following  
57 study completion.  
58  
59  
60

## Participants

Eligible participants must be  $\geq 18$  years of age with hyperkalaemia, defined as  $K^+ \geq 5.8$  mEq/L (chosen as the value where an intervention is required in the ED), obtained via local laboratory or point-of-care testing. Exclusion criteria include clinically significant arrhythmia, hemodynamic instability (defined as mean arterial pressure  $\leq 65$  mmHg, or heart rate  $\leq 40$  or  $\geq 125$  beats per minute), hyperkalaemia solely due to overdose of  $K^+$  supplements, known bowel obstruction, treatment with  $K^+$  binders in the 7 days prior to enrolment, expected dialysis during the first 6 hours of study treatment, known hypersensitivity to patiromer or its ingredients, participation in any other investigational study  $< 30$  days prior to screening, life expectancy  $< 6$  months, and pregnancy or breastfeeding.

## Study drug formulation

Patiromer sorbitex calcium (patiromer) or placebo (microcrystalline cellulose) will be stored between 2 and 8°C and provided to the participant blinded, as a powder for oral suspension in packets.

## Randomisation and treatment

Participants will be randomised 1:1 to 25.2 g of patiromer at baseline and 8.4 g 24 hours after the initial dose, or placebo, in addition to SCT, using permuted block randomisation, stratified by baseline chronic dialysis status (on dialysis vs not on dialysis). A maximum of 50% of participants will be on chronic dialysis.

Randomisation will be by a centralised list accessed electronically via an interactive web response system at baseline. Immediately following baseline procedures and randomisation, participants will be administered SCT consisting of glucose (25 g IV  $< 15$  minutes before insulin) given if the blood sugar is below 400 mg/dL, insulin (5

1  
2  
3 units administered as an IV bolus), and aerosolised albuterol (10 mg over 30  
4  
5 minutes). Participants then receive a single oral dose of study drug (25.2 g) at  
6  
7 baseline (patiromer or placebo). The study drug will be prepared immediately prior to  
8  
9 administration and given at least 3 hours before or after other orally administered  
10  
11 medications, if possible, in the ED. Study drug will be mixed with water, apple juice,  
12  
13 or cranberry juice only. A second dose of the same study drug will be administered  
14  
15 24 hours after the initial dose.  
16  
17  
18  
19  
20

## 21 Endpoints

22  
23 The primary endpoint is the net clinical benefit, as previously described in a *post hoc*  
24  
25 analysis of the REDUCE study<sup>40</sup>, defined as the mean change in the number of  
26  
27 interventions less the change in serum K<sup>+</sup>, at hour 6 between the groups (**Figure 3**).  
28  
29

30 Interventions consist of additional potassium-related medical interventions, defined  
31  
32 as post-baseline administration of insulin, glucose, or albuterol (or their combination)  
33  
34 at any dose, or any other potassium-lowering medication provided to participants at  
35  
36 any time during the treatment period at the discretion of the Investigator.  
37  
38

39 Assessment of the efficacy of K<sup>+</sup> binders in the ED can be confounded owing to  
40  
41 repeat administrations of insulin and/or albuterol. Therefore, net clinical benefit is  
42  
43 used to simultaneously assess both the number of additional potassium-lowering  
44  
45 medications required and the change in serum K<sup>+</sup>. Secondary endpoints are the net  
46  
47 clinical benefit at hour 4; the proportion of participants without post-baseline K<sup>+</sup>-  
48  
49 related medical interventions at hours 4, 6, and 8; the number of post-baseline K<sup>+</sup>-  
50  
51 related medical interventions up until hours 6 and 8, and ED discharge; the  
52  
53 proportion of participants with sustained K<sup>+</sup> reduction (defined as K<sup>+</sup> ≤5.5 mEq/L and  
54  
55 4 hours without K<sup>+</sup>-related medical intervention) at hours 6 and 8; and serum K<sup>+</sup> 24  
56  
57  
58  
59  
60

1  
2  
3 hours after ED discharge. An exploratory endpoint is the time to ED discharge.  
4  
5 Safety endpoints are the incidence and severity of AEs, and changes from baseline  
6  
7 in serum K<sup>+</sup>, magnesium, and electrocardiogram (ECG). AEs and concomitant  
8  
9 medications will be assessed every 2 hours after enrolment, until hour 10 or  
10  
11 discharge from the ED; glucose checks are performed when clinically indicated by  
12  
13 the medical team (a glucose check is not required by the protocol) e.g., when a basic  
14  
15 metabolic panel is drawn for K<sup>+</sup> value, a glucose value will also be recorded.  
16  
17  
18  
19  
20  
21

### 22 **Statistical analysis**

23  
24 Based on the pilot study <sup>27</sup>, a power calculation determined that a sample size of 60  
25  
26 participants per treatment arm provides 90% power to detect a difference between  
27  
28 the placebo and patiromer groups at 2-sided  $\alpha=0.05$ . Accounting for a potential  
29  
30 treatment discontinuation rate of 60% by 6 hours, based on the nature of the disease  
31  
32 and the need for emergent interventions beyond this protocol, 150 participants per  
33  
34 treatment arm will be enrolled to reach the required sample size of 60 participants  
35  
36 per arm for the final analysis.  
37  
38  
39

40  
41 The full analysis set (FAS) will consist of all participants who receive at least one  
42  
43 dose of randomised treatment and have at least two post-baseline assessments or a  
44  
45 4-hour post-baseline blood draw. The FAS will be used for the evaluation of efficacy.  
46  
47 The per-protocol set will consist of all participants who, in addition to the FAS criteria,  
48  
49 have no major protocol deviations. The safety set will consist of all randomised  
50  
51 participants who received at least one dose of study drug. Participants in the safety  
52  
53 set will be analysed based on the study drug they received.  
54  
55  
56

57  
58 Net clinical benefit at hour 6 will be compared between groups using a Student's t-  
59  
60 test. A modified intention-to-treat analysis will be used for the primary endpoint, with

1  
2  
3 an imputation method applied for missing data: participants who have been on  
4 placebo or patiromer for at least 4 hours will have the last observation carried  
5 forward to the hour 6 analysis. Secondary endpoints involving proportions of  
6 participants and counts of interventions will be analysed using the Cochran-Mantel-  
7 Haenszel method. Continuous variables (K<sup>+</sup> level at specified time points) will be  
8 analysed using analysis of covariance (ANCOVA) methods. Kaplan-Meier curves will  
9 be used to analyse the time to ED discharge. Safety variables will consist of all AEs,  
10 clinical laboratory test results (serum K<sup>+</sup> and magnesium), clinically significant ECG  
11 findings, and reasons for discontinuing study drug. Abnormal ECGs or other safety  
12 assessments will qualify as an AE if they meet any of the following criteria; 1) it is  
13 accompanied by clinical symptoms or leads to a diagnosis (in such case the  
14 symptom or diagnosis will be recorded as an AE); 2) it results in a change in study  
15 treatment (e.g. dosage modification, treatment interruption, or treatment  
16 discontinuation); 3) it results in a medical intervention, a change in concomitant  
17 therapy, or referral for further testing outside the protocol; 4) it is a clinically  
18 significant abnormality, as judged by the investigator.  
19  
20  
21  
22  
23  
24  
25  
26  
27  
28  
29  
30  
31  
32  
33  
34  
35  
36  
37  
38  
39  
40  
41  
42

### 43 **Patient and Public Involvement**

44  
45  
46 Patients or the public were not involved in the design, or conduct, or reporting, or  
47 dissemination plans of our research.  
48  
49  
50  
51  
52  
53  
54  
55  
56  
57  
58  
59  
60

## Discussion

Although hyperkalaemia is common and potentially life-threatening, there is no standardised ED treatment protocol<sup>1-3 15</sup>. The efficacy and safety of many hyperkalaemia treatments are not well established in the ED, resulting in a considerable variation in treatment, which is not only detrimental to patients but hampers the ability to perform comparative assessments of the benefit of novel therapies.

The PLATINUM study will assess the benefit of adding patiromer to an SCT regimen: glucose (25 g IV <15 minutes before insulin), insulin (5 U administered as an IV bolus), and aerosolised albuterol (10 mg over 30 minutes). As some SCT agents temporarily shift K<sup>+</sup> into the cells repeat administration is commonly required to prevent rebound in serum K<sup>+</sup> levels, increasing the risk of AEs<sup>15-19 25 41 42</sup>. In contrast, patiromer removes K<sup>+</sup> via binding in the gastrointestinal tract<sup>37</sup>. Of note, the PLATINUM study will use 5 U of insulin, as this has similar efficacy to 10 U<sup>41</sup>.

Recently, a retrospective cohort study of 881 unique encounters from emergency departments, inpatient units, and intensive care units, reported that a single dose of patiromer monotherapy was associated with a significant reduction from baseline in serum K<sup>+</sup> in non-emergent hyperkalaemia<sup>43</sup>. An open-label, pilot study in participants randomised to standard of care (SOC) (according to individual practice pattern or hospital protocol) versus 25.2 g of patiromer plus SOC demonstrated a reduction in serum K<sup>+</sup> within 2 hours of with the addition of patiromer; however, reduction in K<sup>+</sup> was not statistically significant at 6 hours, likely due to the small sample size and large variability in mean change in serum K<sup>+</sup><sup>27</sup>.



1  
2  
3 In a *post hoc* analysis of the REDUCE study<sup>40</sup>, net clinical benefit was utilised to  
4 evaluate the efficacy of patiromer plus SOC, compared to SOC alone. Net clinical  
5 benefit was defined as the mean change in the number of additional interventions,  
6 less the mean change in serum K<sup>+</sup>. This novel method of assessing the effect of K<sup>+</sup>  
7 binders considers the overall benefit of both lowering serum K<sup>+</sup> and simultaneously  
8 reducing the number of interventions required. Hence, net clinical benefit combines  
9 two potential merits of a novel agent and will also be useful in future trials as a  
10 method to investigate the effect of K<sup>+</sup> binders to treat hyperkalaemia.  
11  
12  
13  
14  
15  
16  
17  
18  
19  
20  
21

22 The secondary endpoint, serum K<sup>+</sup> 24 hours after ED discharge, will provide insight  
23 on the value of giving a second dose of patiromer at discharge from the ED.  
24

25 Importantly, this study may support a standardised care algorithm with consistent  
26 dosing, reporting efficacy and safety data from a large, randomised, multi-centre trial.  
27  
28  
29  
30  
31

## 32 **Conclusion**

33 PLATINUM is planned to be the largest ED randomised controlled hyperkalaemia  
34 trial ever performed, with the opportunity to assess a standardised approach to  
35 hyperkalaemia management, as well as establish a new evaluation parameter (i.e.,  
36 net clinical benefit) for acute hyperkalaemia treatment investigations.  
37  
38  
39  
40  
41  
42  
43  
44  
45  
46  
47  
48  
49  
50  
51  
52  
53  
54  
55  
56  
57  
58  
59  
60

## Acknowledgements

Medical writing support was provided by AXON Communications, United Kingdom, and funded by CSL Vifor.

## Funding

This work was supported by CSL Vifor.

## Licence Statement

I, the Submitting Author has the right to grant and does grant on behalf of all authors of the Work (as defined in the author licence), an exclusive licence and/or a non-exclusive licence for contributions from authors who are: i) UK Crown employees; ii) where BMJ has agreed a CC-BY licence shall apply, and/or iii) in accordance with the terms applicable for US Federal Government officers or employees acting as part of their official duties; on a worldwide, perpetual, irrevocable, royalty-free basis to BMJ Publishing Group Ltd ("BMJ") its licensees.

### **Contributorship statement**

ZR: Creating the protocol, Interpretation of data, Editing the manuscript

JB: Interpretation of data, Editing the manuscript

CMQ: Interpretation of data, Editing the manuscript

YD: Site investigator, Interpretation of data, Editing the manuscript

BS: Site investigator, Acquisition and interpretation of data, Editing the manuscript

SB: Site investigator, Data collection, Interpretation of data, Editing the manuscript.

JJB: Site investigator, Data collection, Interpretation of data, Editing the manuscript

BED: Site investigator, Data collection, Interpretation of data, Editing the manuscript

FP: Obtaining co-funding, Creating the protocol, Editing the manuscript

CAH: Contributed to study design, Editing the manuscript

MW: Interpretation of data, Editing the manuscript

AS: Interpretation of data, Editing the manuscript

### **Competing Interests**

ZR: No relevant conflicts of interest to disclose

JB: Employee and shareholder of CSL Vifor

CMQ: Employee and shareholder of CSL Vifor

YD: No relevant conflicts of interest to disclose

BS: NHLBI, CDC, Comprehensive Research Associates (institutional grants)

SB: No relevant conflicts of interest to disclose

JJB: No relevant conflicts of interest to disclose

BED: No relevant conflicts of interest to disclose

FP: Research Grants: Brainbox, Instrument Labs, Salix. Consultant: Abbott,

Brainbox, Instrument Labs, Janssen, Osler, Roche, Siemens, CSL Vifor.

1  
2  
3 Stock/Ownership Interests: AseptiScope Inc, Brainbox Inc, Braincheck Inc, Coagulo  
4 Inc, Comprehensive Research Associates LLC, Comprehensive Research  
5 Management Inc, Emergencies in Medicine LLC, Fast Inc, Forrest Devices, Ischemia  
6 DX LLC, Lucia Inc, Prevencio Inc, RCE Technologies, ROMTech, ScPharma,  
7 Trivirum Inc, Upstream Inc

8  
9  
10  
11  
12  
13  
14  
15 CAH: Personal fees (consultant) from AstraZeneca, Bayer, Diamedica, FibroGen,  
16 Merck, NxStage, Pfizer, Relypsa, University of Oxford, Bristol Myers Squibb; Grants  
17 from the University of British Columbia and Bristol Myers Squibb, and the National  
18 Institutes of Health (NIDDK and NHLBI), and author royalties from UpToDate. Stock  
19 ownership in Johnson&Johnson, Merck, and Pfizer. Employee of Hennepin  
20 Healthcare  
21  
22  
23  
24  
25  
26  
27  
28

29 MW: Consulting fees: CSL Vifor and AstraZeneca. Honoraria: CSL Vifor.

30  
31  
32 AS: Research grants: Comprehensive Research Associates. Consulting fees: Astra  
33 Zeneca.  
34  
35  
36  
37  
38  
39  
40  
41  
42  
43  
44  
45  
46  
47  
48  
49  
50  
51  
52  
53  
54  
55  
56  
57  
58  
59  
60

## References

1. Lemoine L, Le Bastard Q, Batard E, et al. An Evidence-Based Narrative Review of the Emergency Department Management of Acute Hyperkalemia. *J Emerg Med* 2021;60(5):599-606. doi: 10.1016/j.jemermed.2020.11.028 [published Online First: 2021/01/12]
2. Lindner G, Burdmann EA, Clase CM, et al. Acute hyperkalemia in the emergency department: a summary from a Kidney Disease: Improving Global Outcomes conference. *Eur J Emerg Med* 2020;27(5):329-37. doi: 10.1097/mej.0000000000000691 [published Online First: 2020/08/28]
3. Singer AJ, Thode HC, Jr., Peacock WF. A retrospective study of emergency department potassium disturbances: severity, treatment, and outcomes. *Clin Exp Emerg Med* 2017;4(2):73-79. doi: 10.15441/ceem.16.194 [published Online First: 2017/07/19]
4. Quality AfHRA. Trends in Prevalence and Control of Hypertension According to the 2017 American College of Cardiology/American Heart Association (ACC/AHA) Guideline. <https://hcupnet.ahrq.gov/#query/eyJBTkFMWVNUJ19UWVBFjpbkFUX1QixSwiT1VUQ09NRV9NRUFTVVJFUyI6WYjPTV9OVU1CRVJfVCIsIk9NX1JBVEVfVCJdLjQUkIOQIQTEVfT1JfQUxMIjpbIBBX0FMTEExJU1RFRCjdlLCJUQUJMRV9UWVBFjpbllRUX0FMTEENPREVTII0sIkNBVEVHT1JJWkFUSU9OX1RZUEUjOIsiQ1RfSUNEQUQIXSwiQ1RfSUNEQUQjOIsiMjcwNSJdLjEJQVRBU0VUx1NPVJDRS16WYjEU19ORURTI19>: Healthcare Cost and Utilization Project.
5. Hunter RW, Bailey MA. Hyperkalemia: pathophysiology, risk factors and consequences. *Nephrol Dial Transplant* 2019;34(Suppl 3):iii2-iii11. doi: 10.1093/ndt/gfz206 [published Online First: 2019/12/05]
6. Lv JC, Zhang LX. Prevalence and Disease Burden of Chronic Kidney Disease. *Adv Exp Med Biol* 2019;1165:3-15. doi: 10.1007/978-981-13-8871-2\_1 [published Online First: 2019/08/11]
7. Bansal S, Pergola PE. Current Management of Hyperkalemia in Patients on Dialysis. *Kidney Int Rep* 2020;5(6):779-89. doi: 10.1016/j.ekir.2020.02.1028 [published Online First: 2020/06/11]
8. Savarese G, Becher PM, Lund LH, et al. Global burden of heart failure: A comprehensive and updated review of epidemiology. *Cardiovasc Res* 2022 doi: 10.1093/cvr/cvac013 [published Online First: 2022/02/13]
9. Dorans KS, Mills KT, Liu Y, et al. Trends in Prevalence and Control of Hypertension According to the 2017 American College of Cardiology/American Heart Association (ACC/AHA) Guideline. *J Am Heart Assoc* 2018;7(11) doi: 10.1161/jaha.118.008888 [published Online First: 2018/06/03]
10. Davis J, Israni R, Betts KA, et al. Real-World Management of Hyperkalemia in the Emergency Department: An Electronic Medical Record Analysis. *Adv Ther* 2021 doi: 10.1007/s12325-021-02017-w [published Online First: 2021/12/28]
11. Rafique Z, Weir MR, Onuigbo M, et al. Expert Panel Recommendations for the Identification and Management of Hyperkalemia and Role of Patiromer in Patients with Chronic Kidney Disease and Heart Failure. *J Manag Care Spec Pharm* 2017;23(4-a Suppl):S10-s19. doi: 10.18553/jmcp.2017.23.4-a.s10 [published Online First: 2017/05/10]
12. Rafique Z, Chouihed T, Mebazaa A, et al. Current treatment and unmet needs of hyperkalaemia in the emergency department. *Eur Heart J Suppl* 2019;21(Suppl A):A12-a19. doi: 10.1093/eurheartj/suy029 [published Online First: 2019/03/07]
13. Rafique Z, Peacock F, Armstead T, et al. Hyperkalemia management in the emergency department: An expert panel consensus. *J Am Coll Emerg Physicians Open* 2021;2(5):e12572. doi: 10.1002/emp2.12572 [published Online First: 2021/10/12]
14. Rossignol P, Legrand M, Kosiborod M, et al. Emergency management of severe hyperkalemia: Guideline for best practice and opportunities for the future. *Pharmacol Res* 2016;113(Pt A):585-91. doi: 10.1016/j.phrs.2016.09.039 [published Online First: 2016/10/21]
15. Peacock WF, Rafique Z, Clark CL, et al. Real World Evidence for Treatment of Hyperkalemia in the Emergency Department (REVEAL-ED): A Multicenter, Prospective, Observational Study. *J*

- 1  
2  
3  
4  
5  
6  
7  
8  
9  
10  
11  
12  
13  
14  
15  
16  
17  
18  
19  
20  
21  
22  
23  
24  
25  
26  
27  
28  
29  
30  
31  
32  
33  
34  
35  
36  
37  
38  
39  
40  
41  
42  
43  
44  
45  
46  
47  
48  
49  
50  
51  
52  
53  
54  
55  
56  
57  
58  
59  
60
- Emerg Med* 2018;55(6):741-50. doi: 10.1016/j.jemermed.2018.09.007 [published Online First: 2018/11/06]
16. Aljabri A, Perona S, Alshibani M, et al. Blood glucose reduction in patients treated with insulin and dextrose for hyperkalemia. *Emerg Med J* 2020;37(1):31-35. doi: 10.1136/emered-2019-208744 [published Online First: 2019/10/28]
17. Farina N, Anderson C. Impact of dextrose dose on hypoglycemia development following treatment of hyperkalemia. *Ther Adv Drug Saf* 2018;9(6):323-29. doi: 10.1177/2042098618768725 [published Online First: 2018/06/02]
18. Jacobi J, Bircher N, Krinsley J, et al. Guidelines for the use of an insulin infusion for the management of hyperglycemia in critically ill patients. *Crit Care Med* 2012;40(12):3251-76. doi: 10.1097/CCM.0b013e3182653269 [published Online First: 2012/11/21]
19. Scott NL, Klein LR, Cales E, et al. Hypoglycemia as a complication of intravenous insulin to treat hyperkalemia in the emergency department. *Am J Emerg Med* 2019;37(2):209-13. doi: 10.1016/j.ajem.2018.05.016 [published Online First: 2018/06/05]
20. Boughton CK, Dixon D, Goble E, et al. Preventing Hypoglycemia Following Treatment of Hyperkalemia in Hospitalized Patients. *J Hosp Med* 2019;14(5):284-87. doi: 10.12788/jhm.3145 [published Online First: 2019/02/23]
21. Piña IL, Yuan J, Ackourey G, et al. Effect of patiomer on serum potassium in hyperkalemic patients with heart failure: Pooled analysis of 3 randomized trials. *Prog Cardiovasc Dis* 2020;63(5):656-61. doi: 10.1016/j.pcad.2020.09.007 [published Online First: 2020/10/03]
22. United States Food and Drug Administration. VELTASSA - patiomer powder, for suspension. Full prescribing information. 2021 [Available from: [https://www.accessdata.fda.gov/drugsatfda\\_docs/label/2021/205739s035lbl.pdf](https://www.accessdata.fda.gov/drugsatfda_docs/label/2021/205739s035lbl.pdf) accessed 30 November, 2022 2022.
23. European Medicines Agency. Veltassa powder for oral suspension. Summary of product characteristics. 2022 [Available from: <https://www.medicines.org.uk/emc/product/779/smpc> accessed 30 November, 2022 2022.
24. Mahoney BA, Smith WA, Lo DS, et al. Emergency interventions for hyperkalemia. *Cochrane Database Syst Rev* 2005;2005(2):Cd003235. doi: 10.1002/14651858.CD003235.pub2 [published Online First: 2005/04/23]
25. Moussavi K, Garcia J, Tellez-Corrales E, et al. Reduced alternative insulin dosing in hyperkalemia: A meta-analysis of effects on hypoglycemia and potassium reduction. *Pharmacotherapy* 2021;41(7):598-607. doi: 10.1002/phar.2596 [published Online First: 2021/05/17]
26. Peacock WF, Rafique Z, Vishnevskiy K, et al. Emergency Potassium Normalization Treatment Including Sodium Zirconium Cyclosilicate: A Phase II, Randomized, Double-blind, Placebo-controlled Study (ENERGIZE). *Acad Emerg Med* 2020;27(6):475-86. doi: 10.1111/acem.13954 [published Online First: 2020/03/10]
27. Rafique Z, Liu M, Staggers KA, et al. Patiomer for Treatment of Hyperkalemia in the Emergency Department: A Pilot Study. *Acad Emerg Med* 2020;27(1):54-60. doi: 10.1111/acem.13868 [published Online First: 2019/10/11]
28. Sodium Polystyrene Sulfonate (Kayexalate) [prescribing information]. Available: <http://products.sanofi.us/kayexalate/kayexalate.pdf>. Accessed February 2021 .
29. Administration USFaD. Sodium polystyrene sulfonate prescribing information. [https://www.accessdata.fda.gov/drugsatfda\\_docs/label/2009/011287s022lbl.pdf.2009](https://www.accessdata.fda.gov/drugsatfda_docs/label/2009/011287s022lbl.pdf.2009) [accessed 16 March 2022.
30. Chaitman M, Dixit D, Bridgeman MB. Potassium-Binding Agents for the Clinical Management of Hyperkalemia. *P t* 2016;41(1):43-50. [published Online First: 2016/01/15]
31. Blair HA. Patiomer: A Review in Hyperkalemia. *Clin Drug Investig* 2018;38(8):785-94. doi: 10.1007/s40261-018-0675-8 [published Online First: 2018/07/22]
32. Ali W, Bakris G. Evolution of Patiomer Use: a Review. *Curr Cardiol Rep* 2020;22(9):94. doi: 10.1007/s11886-020-01342-w [published Online First: 2020/07/11]

- 1  
2  
3 33. Bakris GL, Pitt B, Weir MR, et al. Effect of Patiromer on Serum Potassium Level in Patients With  
4 Hyperkalemia and Diabetic Kidney Disease: The AMETHYST-DN Randomized Clinical Trial.  
5 *Jama* 2015;314(2):151-61. doi: 10.1001/jama.2015.7446 [published Online First:  
6 2015/07/15]  
7  
8 34. Bushinsky DA, Williams GH, Pitt B, et al. Patiromer induces rapid and sustained potassium  
9 lowering in patients with chronic kidney disease and hyperkalemia. *Kidney Int*  
10 2015;88(6):1427-33. doi: 10.1038/ki.2015.270 [published Online First: 2015/09/17]  
11  
12 35. Weir MR, Bakris GL, Bushinsky DA, et al. Patiromer in patients with kidney disease and  
13 hyperkalemia receiving RAAS inhibitors. *N Engl J Med* 2015;372(3):211-21. doi:  
14 10.1056/NEJMoa1410853 [published Online First: 2014/11/22]  
15  
16 36. Pitt B, Anker SD, Bushinsky DA, et al. Evaluation of the efficacy and safety of RLY5016, a  
17 polymeric potassium binder, in a double-blind, placebo-controlled study in patients with  
18 chronic heart failure (the PEARL-HF) trial. *Eur Heart J* 2011;32(7):820-8. doi:  
19 10.1093/eurheartj/ehq502 [published Online First: 2011/01/07]  
20  
21 37. Li L, Harrison SD, Cope MJ, et al. Mechanism of Action and Pharmacology of Patiromer, a  
22 Nonabsorbed Cross-Linked Polymer That Lowers Serum Potassium Concentration in Patients  
23 With Hyperkalemia. *J Cardiovasc Pharmacol Ther* 2016;21(5):456-65. doi:  
24 10.1177/1074248416629549 [published Online First: 2016/02/10]  
25  
26 38. World Medical Association. World Medical Association Declaration of Helsinki: ethical principles  
27 for medical research involving human subjects. *Jama* 2013;310(20):2191-4. doi:  
28 10.1001/jama.2013.281053 [published Online First: 2013/10/22]  
29  
30 39. International Council for Harmonisation of Technical Requirements for Registration of  
31 Pharmaceuticals for Human Use (ICH). ICH harmonised guideline. Guideline for good clinical  
32 practice E6(R2). In: ICH, ed., 2017.  
33  
34 40. Rafique Z, Budden J, Boone S, et al. SAEM22 Abstracts: Net Clinical Benefit of Patiromer: A Post  
35 Hoc Analysis of the REDUCE Trial. *Academic Emergency Medicine* 2022;29:S8-S429.  
36  
37 41. Pierce DA, Russell G, Pirkle JL, Jr. Incidence of Hypoglycemia in Patients With Low eGFR Treated  
38 With Insulin and Dextrose for Hyperkalemia. *Ann Pharmacother* 2015;49(12):1322-6. doi:  
39 10.1177/1060028015607559 [published Online First: 2015/09/30]  
40  
41 42. Humphrey TJL, James G, Wilkinson IB, et al. Clinical outcomes associated with the emergency  
42 treatment of hyperkalaemia with intravenous insulin-dextrose. *Eur J Intern Med* 2022;95:87-  
43 92. doi: 10.1016/j.ejim.2021.09.018 [published Online First: 2021/10/10]  
44  
45 43. Di Palo KE, Sinnott MJ, Goriacko P. Assessment of Patiromer Monotherapy for Hyperkalemia in  
46 an Acute Care Setting. *JAMA Netw Open* 2022;5(1):e2145236. doi:  
47 10.1001/jamanetworkopen.2021.45236 [published Online First: 2022/01/27]  
48  
49  
50  
51  
52  
53  
54  
55  
56  
57  
58  
59  
60



## Figure legends

### Figure 1. PLATINUM study design.

\*Local laboratory or point-of-care testing may be utilised to confirm eligibility for the study. Potassium testing can be repeated at the discretion of the Investigator at any time during the treatment period but is required at hour 4.

ED, Emergency Department; EoED, end of Emergency Department stay (defined as discharge from the ED or initiation of dialysis); SCT, standard combination therapy (defined as 5 U intravenous insulin, 25 g intravenous glucose, and 10 mg aerosolised albuterol) and potassium-related medical intervention (defined as additional administration of insulin, glucose, or albuterol [or their combination] at any dose, or any other potassium-lowering medication can be initiated and repeated at the discretion of the Investigator at any time); however, SCT is recommended.

### Figure 2. Proposed study centre locations.

Study centres actively enrolling participants are shown on map. 1) Stanford University School of Medicine, California; 2) Henry JN Taub Hospital/Baylor College of Medicine, Texas; 3) Hennepin County Medical Center. University of Minnesota, Minnesota; 4) Stony Brook University Hospital, Stony Brook, New York; 5) Yale University, Connecticut; 6) Henry Ford Hospital, Michigan; 7) University of Cincinnati, Ohio; 8) Wake Forest University, North Carolina; 9) The Ohio State University Wexner Medical Center, Ohio; 10) Baystate Health, Massachusetts; 11) Washington University in St. Louis, Missouri; 12) UT Memorial Hermann Hospital, Texas Medical Center, Texas; 13) Mt Sinai. Icahn School of Medicine, New York; 14) Cristiana Care, Wilmington, Delaware; 15) University of Kansas Medical Center, Kansas; 16)



1  
2  
3 Meritus Medical Center, Maryland; 17) George Washington University, Washington  
4  
5 D.C.  
6  
7

8 **Figure 3. Primary Endpoint: net clinical benefit.**  
9

10  
11 ‡ Number of additional potassium (K<sup>+</sup>) lowering interventions after initial treatment.  
12 ΔK will be determined from laboratory potassium (K<sup>+</sup>) values.  
13  
14  
15  
16  
17  
18  
19  
20  
21  
22  
23  
24  
25  
26  
27  
28  
29  
30  
31  
32  
33  
34  
35  
36  
37  
38  
39  
40  
41  
42  
43  
44  
45  
46  
47  
48  
49  
50  
51  
52  
53  
54  
55  
56  
57  
58  
59  
60

For peer review only

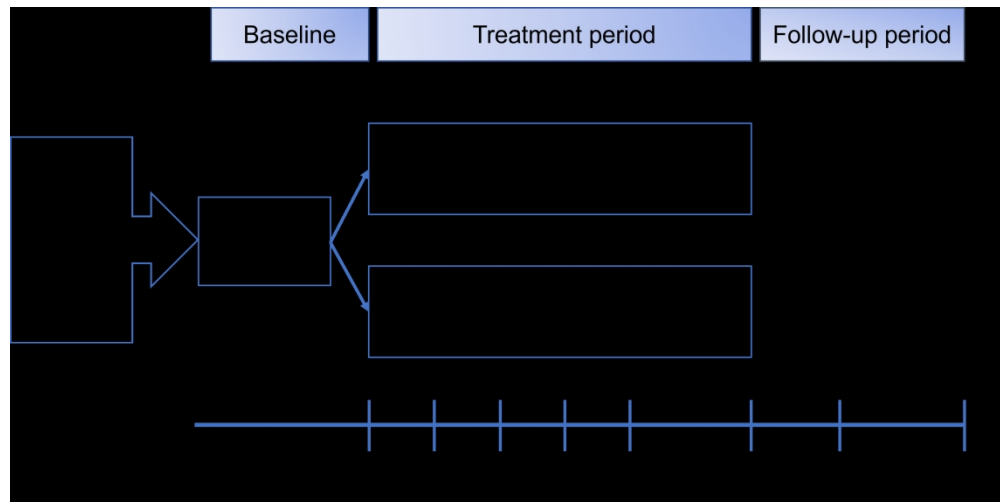

**Figure 1. PLATINUM study design**

\*Local laboratory or point-of-care testing may be utilised to confirm eligibility for the study. Potassium testing can be repeated at the discretion of the Investigator at any time during the treatment period but is required at hour 4. ED, Emergency Department; EoED, end of Emergency Department stay (defined as discharge from the ED or initiation of dialysis); SCT, standard combination therapy (defined as 5 U intravenous insulin, 25 g intravenous glucose, and 10 mg aerosolised albuterol) and potassium-related medical intervention (defined as additional administration of insulin, glucose, or albuterol [or their combination] at any dose, or any other potassium-lowering medication can be initiated and repeated at the discretion of the Investigator at any time); however, SCT is recommended.

262x129mm (300 x 300 DPI)

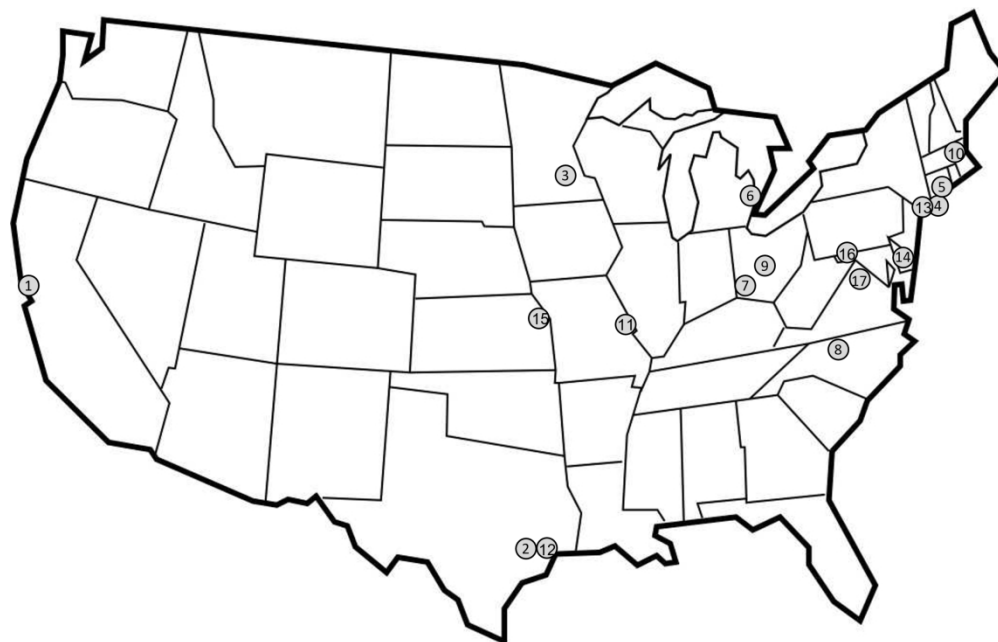

**Figure 2. Proposed study centre locations.**

Study centres actively enrolling participants are shown on map. 1) Stanford University School of Medicine, California; 2) Henry JN Taub Hospital/Baylor College of Medicine, Texas; 3) Hennepin County Medical Center. University of Minnesota, Minnesota; 4) Stony Brook University Hospital, Stony Brook, New York; 5) Yale University, Connecticut; 6) Henry Ford Hospital, Michigan; 7) University of Cincinnati, Ohio; 8) Wake Forest University, North Carolina; 9) The Ohio State University Wexner Medical Center, Ohio; 10) Baystate Health, Massachusetts; 11) Washington University in St. Louis, Missouri; 12) UT Memorial Hermann Hospital, Texas Medical Center, Texas; 13) Mt Sinai. Icahn School of Medicine, New York; 14) Cristiana Care, Wilmington, Delaware; 15) University of Kansas Medical Center, Kansas; 16) Meritus Medical Center, Maryland; 17) George Washington University, Washington D.C.

247x157mm (300 x 300 DPI)

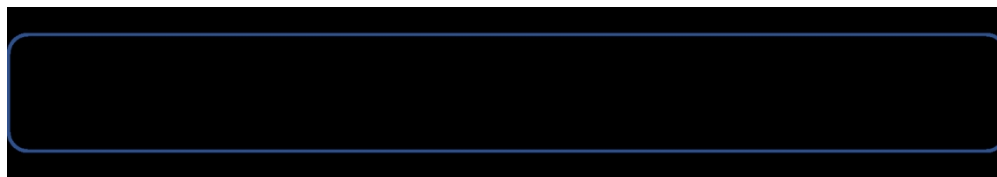

**Figure 3. Primary Endpoint: net clinical benefit**

‡ Number of additional potassium (K+) lowering interventions after initial treatment.  $\Delta K$  will be determined from laboratory potassium (K+) values.

126x21mm (300 x 300 DPI)

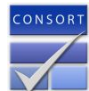

## CONSORT 2010 checklist of information to include when reporting a randomised trial\*

| Section/Topic                    | Item No | Checklist item                                                                                                                                                                              | Reported on page No |
|----------------------------------|---------|---------------------------------------------------------------------------------------------------------------------------------------------------------------------------------------------|---------------------|
| <b>Title and abstract</b>        |         |                                                                                                                                                                                             |                     |
|                                  | 1a      | Identification as a randomised trial in the title                                                                                                                                           | 1                   |
|                                  | 1b      | Structured summary of trial design, methods, results, and conclusions (for specific guidance see CONSORT for abstracts)                                                                     | 4                   |
| <b>Introduction</b>              |         |                                                                                                                                                                                             |                     |
| Background and objectives        | 2a      | Scientific background and explanation of rationale                                                                                                                                          | 7-8                 |
|                                  | 2b      | Specific objectives or hypotheses                                                                                                                                                           | 8                   |
| <b>Methods</b>                   |         |                                                                                                                                                                                             |                     |
| Trial design                     | 3a      | Description of trial design (such as parallel, factorial) including allocation ratio                                                                                                        | 9-10                |
|                                  | 3b      | Important changes to methods after trial commencement (such as eligibility criteria), with reasons                                                                                          | N/A                 |
| Participants                     | 4a      | Eligibility criteria for participants                                                                                                                                                       | 10                  |
|                                  | 4b      | Settings and locations where the data were collected                                                                                                                                        | 9, 23               |
| Interventions                    | 5       | The interventions for each group with sufficient details to allow replication, including how and when they were actually administered                                                       | 10-11               |
| Outcomes                         | 6a      | Completely defined pre-specified primary and secondary outcome measures, including how and when they were assessed                                                                          | 11-12               |
|                                  | 6b      | Any changes to trial outcomes after the trial commenced, with reasons                                                                                                                       | N/A                 |
| Sample size                      | 7a      | How sample size was determined                                                                                                                                                              | 12                  |
|                                  | 7b      | When applicable, explanation of any interim analyses and stopping guidelines                                                                                                                | N/A                 |
| <b>Randomisation:</b>            |         |                                                                                                                                                                                             |                     |
| Sequence generation              | 8a      | Method used to generate the random allocation sequence                                                                                                                                      | 10-11               |
|                                  | 8b      | Type of randomisation; details of any restriction (such as blocking and block size)                                                                                                         | 10                  |
| Allocation concealment mechanism | 9       | Mechanism used to implement the random allocation sequence (such as sequentially numbered containers), describing any steps taken to conceal the sequence until interventions were assigned | 10-11               |
| Implementation                   | 10      | Who generated the random allocation sequence, who enrolled participants, and who assigned participants to interventions                                                                     | 10-11               |
| Blinding                         | 11a     | If done, who was blinded after assignment to interventions (for example, participants, care providers, those                                                                                | 9                   |

|                                                      |     |                                                                                                                                                   |       |
|------------------------------------------------------|-----|---------------------------------------------------------------------------------------------------------------------------------------------------|-------|
|                                                      |     | assessing outcomes) and how                                                                                                                       |       |
|                                                      | 11b | If relevant, description of the similarity of interventions                                                                                       | 10    |
| Statistical methods                                  | 12a | Statistical methods used to compare groups for primary and secondary outcomes                                                                     | 12-13 |
|                                                      | 12b | Methods for additional analyses, such as subgroup analyses and adjusted analyses                                                                  | 12-13 |
| <b>Results</b>                                       |     |                                                                                                                                                   |       |
| Participant flow (a diagram is strongly recommended) | 13a | For each group, the numbers of participants who were randomly assigned, received intended treatment, and were analysed for the primary outcome    | N/A   |
|                                                      | 13b | For each group, losses and exclusions after randomisation, together with reasons                                                                  | N/A   |
| Recruitment                                          | 14a | Dates defining the periods of recruitment and follow-up                                                                                           | N/A   |
|                                                      | 14b | Why the trial ended or was stopped                                                                                                                | N/A   |
| Baseline data                                        | 15  | A table showing baseline demographic and clinical characteristics for each group                                                                  | N/A   |
| Numbers analysed                                     | 16  | For each group, number of participants (denominator) included in each analysis and whether the analysis was by original assigned groups           | N/A   |
| Outcomes and estimation                              | 17a | For each primary and secondary outcome, results for each group, and the estimated effect size and its precision (such as 95% confidence interval) | N/A   |
|                                                      | 17b | For binary outcomes, presentation of both absolute and relative effect sizes is recommended                                                       | N/A   |
| Ancillary analyses                                   | 18  | Results of any other analyses performed, including subgroup analyses and adjusted analyses, distinguishing pre-specified from exploratory         | N/A   |
| Harms                                                | 19  | All important harms or unintended effects in each group (for specific guidance see CONSORT for harms)                                             | N/A   |
| <b>Discussion</b>                                    |     |                                                                                                                                                   |       |
| Limitations                                          | 20  | Trial limitations, addressing sources of potential bias, imprecision, and, if relevant, multiplicity of analyses                                  | N/A   |
| Generalisability                                     | 21  | Generalisability (external validity, applicability) of the trial findings                                                                         | 15    |
| Interpretation                                       | 22  | Interpretation consistent with results, balancing benefits and harms, and considering other relevant evidence                                     | N/A   |
| <b>Other information</b>                             |     |                                                                                                                                                   |       |
| Registration                                         | 23  | Registration number and name of trial registry                                                                                                    | 5     |
| Protocol                                             | 24  | Where the full trial protocol can be accessed, if available                                                                                       | 5     |
| Funding                                              | 25  | Sources of funding and other support (such as supply of drugs), role of funders                                                                   | 16    |

\*We strongly recommend reading this statement in conjunction with the CONSORT 2010 Explanation and Elaboration for important clarifications on all the items. If relevant, we also recommend reading CONSORT extensions for cluster randomised trials, non-inferiority and equivalence trials, non-pharmacological treatments, herbal interventions, and pragmatic trials. Additional extensions are forthcoming: for those and for up to date references relevant to this checklist, see [www.consort-statement.org](http://www.consort-statement.org).

# BMJ Open

**Patiromer utility as an adjunct treatment in patients needing urgent hyperkalaemia management (PLATINUM): design of a multicentre, randomised, double-blind, placebo-controlled, parallel group study**

|                                 |                                                                                                                                                                                                                                                                                                                                                                                                                                                                                                                                                                                                                                                                                                                                                                                                                                                                                                                                                                                                                                                                                                        |
|---------------------------------|--------------------------------------------------------------------------------------------------------------------------------------------------------------------------------------------------------------------------------------------------------------------------------------------------------------------------------------------------------------------------------------------------------------------------------------------------------------------------------------------------------------------------------------------------------------------------------------------------------------------------------------------------------------------------------------------------------------------------------------------------------------------------------------------------------------------------------------------------------------------------------------------------------------------------------------------------------------------------------------------------------------------------------------------------------------------------------------------------------|
| Journal:                        | <i>BMJ Open</i>                                                                                                                                                                                                                                                                                                                                                                                                                                                                                                                                                                                                                                                                                                                                                                                                                                                                                                                                                                                                                                                                                        |
| Manuscript ID                   | bmjopen-2022-071311.R1                                                                                                                                                                                                                                                                                                                                                                                                                                                                                                                                                                                                                                                                                                                                                                                                                                                                                                                                                                                                                                                                                 |
| Article Type:                   | Protocol                                                                                                                                                                                                                                                                                                                                                                                                                                                                                                                                                                                                                                                                                                                                                                                                                                                                                                                                                                                                                                                                                               |
| Date Submitted by the Author:   | 04-May-2023                                                                                                                                                                                                                                                                                                                                                                                                                                                                                                                                                                                                                                                                                                                                                                                                                                                                                                                                                                                                                                                                                            |
| Complete List of Authors:       | Rafique, Zubaid ; Baylor College of Medicine, Henry JN Taub Department of Emergency Medicine<br>Farrell, Alex; AXON Communications Inc London,<br>Budden, Jeffrey; CSL Vifor<br>Quinn, Carol Moreno; CSL Vifor<br>Duanmu, Youyou; Stanford University School of Medicine, Department of Emergency Medicine<br>Safdar, Basmah; Yale University School of Medicine, Emergency Medicine<br>Bischof, Jason; The Ohio State University Wexner Medical Center, Emergency Medicine<br>Driver, Brian; Hennepin County Medical Center, Emergency Medicine<br>Herzog, Charles; Hennepin Healthcare/University of Minnesota, Division of Cardiology, Department of Internal Medicine<br>Weir, Matthew R.; University of Maryland School of Medicine, Department of Medicine<br>Singer, Adam J.; SUNY Stony Brook, Emergency Medicine; Stony Brook University, Department of Emergency Medicine<br>Boone, Stephen; Baylor College of Medicine, Henry JN Taub Department of Emergency Medicine<br>Soto, Karina; Comprehensive Research Associates<br>Peacock, Frank; Baylor College of Medicine, Emergency Medicine |
| <b>Primary Subject Heading</b>: | Emergency medicine                                                                                                                                                                                                                                                                                                                                                                                                                                                                                                                                                                                                                                                                                                                                                                                                                                                                                                                                                                                                                                                                                     |
| Secondary Subject Heading:      | Cardiovascular medicine, Pharmacology and therapeutics                                                                                                                                                                                                                                                                                                                                                                                                                                                                                                                                                                                                                                                                                                                                                                                                                                                                                                                                                                                                                                                 |
| Keywords:                       | Hypertension < CARDIOLOGY, Clinical trials < THERAPEUTICS, Heart failure < CARDIOLOGY, ACCIDENT & EMERGENCY MEDICINE                                                                                                                                                                                                                                                                                                                                                                                                                                                                                                                                                                                                                                                                                                                                                                                                                                                                                                                                                                                   |
|                                 |                                                                                                                                                                                                                                                                                                                                                                                                                                                                                                                                                                                                                                                                                                                                                                                                                                                                                                                                                                                                                                                                                                        |

SCHOLARONE™  
Manuscripts

1  
2  
3 1 **Patiromer utility as an adjunct treatment in patients needing urgent**  
4  
5 2 **hyperkalaemia management (PLATINUM): design of a multicentre, randomised,**  
6  
7 3 **double-blind, placebo-controlled, parallel group study**  
8  
9

10 4 **Authors:** Zubaid Rafique MD<sup>1</sup>, Jeffrey Budden BS<sup>2</sup>, Carol Moreno Quinn<sup>3</sup>, Youyou  
11  
12 5 Duanmu MD MPH<sup>4</sup>, Basmah Safdar MD MSc<sup>5</sup>, Jason J. Bischof<sup>6</sup>, Brian E Driver<sup>7</sup>,  
13  
14 6 Charles A. Herzog<sup>8</sup>, Matthew R. Weir<sup>9</sup>, Adam J. Singer<sup>10</sup>, Stephen Boone MD<sup>1</sup>,  
15  
16 7 Karina M. Soto-Ruiz MD<sup>11</sup>, W. Frank Peacock MD<sup>1</sup>  
17  
18

19 8 **Affiliations:** <sup>1</sup>Henry JN Taub Department of Emergency Medicine, Baylor College of  
20  
21 9 Clinical Medicine, Houston, TX, USA. <sup>2</sup>CSL Vifor, Redwood City, CA, USA. <sup>3</sup>CSL  
22  
23 10 Vifor, Glattbrugg, Switzerland. <sup>4</sup>Department of Emergency Medicine, Stanford  
24  
25 11 University School of Medicine, Palo Alto, CA, USA. <sup>5</sup>Department of Emergency  
26  
27 12 Medicine, Yale School of Medicine, New Haven, CT, USA. <sup>6</sup>Department of  
28  
29 13 Emergency Medicine, The Ohio State University Wexner Medical Center, Columbus,  
30  
31 14 OH, USA. <sup>7</sup>Department of Emergency Medicine, Hennepin County Medical Center,  
32  
33 15 Minneapolis, MN, USA. <sup>8</sup>Division of Cardiology, Department of Internal Medicine,  
34  
35 16 Hennepin Healthcare/University of Minnesota, Minneapolis, MN, USA. <sup>9</sup>Division of  
36  
37 17 Nephrology, Department of Medicine, University of Maryland School of Medicine,  
38  
39 18 Baltimore, USA. <sup>10</sup>Department of Emergency Medicine, Stony Brook University  
40  
41 19 Hospital, Stony Brook, NY, USA. <sup>11</sup>Comprehensive Research Associates, Houston,  
42  
43 20 TX, USA.  
44  
45  
46  
47  
48  
49

50 21  
51  
52 22 **Correspondence to:**  
53  
54 23 Zubaid Rafique  
55  
56 24 zubaidrafique@gmail.com  
57  
58  
59  
60



1  
2  
3 25 **Running title (< 50 characters incl. spaces):** Patiromer in hyperkalaemia

4  
5 26 (PLATINUM): protocol

6  
7 27 **Word count:** 2789 words

8  
9  
10  
11  
12  
13  
14  
15  
16  
17  
18  
19  
20  
21  
22  
23  
24  
25  
26  
27  
28  
29  
30  
31  
32  
33  
34  
35  
36  
37  
38  
39  
40  
41  
42  
43  
44  
45  
46  
47  
48  
49  
50  
51  
52  
53  
54  
55  
56  
57  
58  
59  
60

For peer review only

1  
2  
3 **28 Abstract**  
4

5  
6 **29 Introduction:** Hyperkalaemia is common, life-threatening, and often requires  
7  
8 30 emergency department (ED) management, however no standardised ED treatment  
9  
10 31 protocol exists. Common treatments transiently reducing serum potassium (K<sup>+</sup>)  
11  
12 32 (including albuterol, glucose and insulin) may cause hypoglycaemia. We outline the  
13  
14 33 design and rationale of the Patiromer Utility as an Adjunct Treatment in Patients  
15  
16 34 Needing Urgent Hyperkalaemia Management (PLATINUM) study, which will be the  
17  
18 35 largest ED randomised controlled hyperkalaemia trial ever performed, enabling  
19  
20 36 assessment of a standardised approach to hyperkalaemia management, as well as  
21  
22 37 establishing a new evaluation parameter (net clinical benefit) for acute  
23  
24 38 hyperkalaemia treatment investigations.  
25  
26  
27  
28

29 **39 Methods and analysis:** Platinum is a Phase 4, multicentre, randomised, double-  
30  
31 40 blind, placebo-controlled study in participants who present to the ED at  
32  
33 41 approximately 30 US sites. Approximately 300 adult participants with hyperkalaemia  
34  
35 42 (K<sup>+</sup> ≥5.8 mEq/L) will be enrolled. Participants will be randomised 1:1 to receive  
36  
37 43 glucose (25 g intravenously [IV] <15 minutes before insulin), insulin (5 units IV bolus)  
38  
39 44 and aerosolised albuterol (10 mg over 30 minutes), followed by a single oral dose of  
40  
41 45 either 25.2 g patiromer or placebo, with a second dose of patiromer (8.4 g) or  
42  
43 46 placebo after 24 hours. The primary endpoint is net clinical benefit, defined as the  
44  
45 47 mean change in the number of additional interventions less the mean change in  
46  
47 48 serum K<sup>+</sup>, at hour 6. Secondary endpoints are net clinical benefit at hour 4,  
48  
49 49 proportion of participants without additional K<sup>+</sup>-related medical interventions, number  
50  
51 50 of additional K<sup>+</sup>-related interventions, and proportion of participants with sustained K<sup>+</sup>  
52  
53 51 reduction (K<sup>+</sup> ≤5.5 mEq/L). Safety endpoints are the incidence of adverse events,  
54  
55 52 and severity of changes in serum K<sup>+</sup> and magnesium.  
56  
57  
58  
59  
60

1  
2  
3 53 **Ethics and dissemination:** A central Institutional Review Board and Ethics  
4  
5 54 Committee provided protocol approval (#20201569), with subsequent approval by  
6  
7 55 local IRBs at each site, and participants will provide written consent. Primary results  
8  
9 56 will be published in peer reviewed manuscripts promptly following study completion.  
10  
11  
12

13 57 **Trial registration:** ClinicalTrials.gov, NCT04443608.  
14  
15  
16 58

### 17 18 59 **Strengths and limitations of this study**

- 20  
21 60 • PLATINUM is planned to be the largest emergency department (ED)  
22  
23 61 randomised controlled hyperkalaemia trial ever performed.  
24  
25 62 • This study will provide the opportunity to assess a standardised approach to  
26  
27 63 hyperkalaemia management.  
28  
29 64 • The study will also establish a new evaluation parameter (i.e., net clinical  
30  
31 65 benefit) for acute hyperkalaemia treatment investigations.  
32  
33 66 • Limitations include the difficulties of patient recruitment in an ED environment,  
34  
35 67 and that further studies may be required to assess the benefit of patiromer as  
36  
37 68 an adjunct treatment to other ED hyperkalaemia therapies (other than the  
38  
39 69 protocol-specified standard of care).  
40  
41  
42  
43  
44  
45  
46  
47  
48  
49  
50  
51  
52  
53  
54  
55  
56  
57  
58  
59  
60

## 71 Introduction

72 Hyperkalaemia, generally defined as serum potassium ( $K^+$ )  $>5.5$  mEq/L, is common,  
73 can lead to life-threatening cardiac arrhythmias, and frequently affects patients in the  
74 emergency department (ED)<sup>1-3</sup>. In 2014, more than 1 million ED visits had an ICD-9  
75 code related to hyperkalaemia<sup>4</sup>, with emergent hyperkalemia likely to rise in parallel  
76 with increasing prevalence of hyperkalaemia risk factors<sup>5</sup> (e.g. chronic kidney  
77 disease<sup>6,7</sup>, heart failure<sup>8</sup> and hypertension<sup>9</sup>). In addition, many patients have  
78 recurrent hyperkalaemia following discharge from the ED<sup>10</sup>. Expert panel  
79 recommendations and treatment algorithms for the management of hyperkalaemia  
80 <sup>11-14</sup> exist, however there is no standardised US protocol for ED hyperkalaemia  
81 management<sup>15</sup>. Common medications currently used to treat hyperkalaemia in the  
82 ED, such as nebulised albuterol and intravenous insulin, with or without glucose<sup>11,12</sup>  
83 <sup>14-24</sup>, often cause adverse events (AEs), such as hypoglycaemia or hyperglycaemia  
84 <sup>15-19,25</sup>. Additionally, treatments that only shift  $K^+$  into the cell, rather than remove it,  
85 frequently result in recurrence of hyperkalaemia 2–3 hours after treatment<sup>41</sup>,  
86 particularly in patients undergoing hemodialysis<sup>7</sup>. Repeat treatment to counter  
87 hyperkalaemia recurrence then further increases the risk of AEs.

88 Alternatively, the use of  $K^+$  binders to eliminate  $K^+$  may be a better treatment strategy  
89 for emergent hyperkalaemia, although the current evidence lacks evaluation in a  
90 large randomised controlled trial<sup>24</sup>. Two small, randomised studies (REDUCE and  
91 ENERGIZE) have shown promising results by adding either patiromer or sodium  
92 zirconium cyclosilicate to insulin and glucose therapy or investigator-designated  
93 standard of care, however, these studies were statistically inconclusive<sup>26,27</sup>. Sodium  
94 polystyrene sulfonate (SPS) is a historically established treatment for chronic  
95 hyperkalaemia, reducing serum  $K^+$  via colonic excretion<sup>28</sup>. However, the onset of

1  
2  
3 96 action, degree of K<sup>+</sup> lowering, and patient tolerance of SPS are unpredictable <sup>7 29 30</sup>.  
4  
5 97 Loop diuretics are commonly used in management of acute hyperkalemia; however,  
6  
7 98 there is a lack of clinical studies to support their use in this setting <sup>2</sup>. Ultimately,  
8  
9  
10 99 dialysis represents a definitive treatment for hyperkalaemia, however effective  
11  
12 100 management of hyperkalaemia through dialysis is complex and challenging<sup>7</sup>. Thus,  
13  
14 101 the new oral K<sup>+</sup> binders with fewer adverse effects, such as patiromer, may offer a  
15  
16 102 solution for the removal of excess K<sup>+</sup> in hyperkalaemic patients presenting to the ED.  
17  
18 103 Patiromer is a non-absorbed, oral K<sup>+</sup> binder using sodium-free exchange <sup>31</sup> with  
19  
20 104 efficacy in the treatment of hyperkalaemia in patients with chronic kidney disease  
21  
22 105 and heart failure <sup>21 27 32-36</sup> and approval for use in the US <sup>22</sup> and EU <sup>23</sup> for treatment of  
23  
24 106 hyperkalaemia. Given the variability of hyperkalaemia treatment in the ED <sup>15</sup>, the  
25  
26 107 challenge of emergent dialysis <sup>7</sup>, and the serious risks of AEs with insulin treatment  
27  
28 108 <sup>15-19 25</sup>, there is a need for evaluation of novel K<sup>+</sup> binders as additional treatments in  
29  
30 109 the ED that act to remove excess K<sup>+</sup> <sup>37 38</sup>, which have fewer AEs.  
31  
32  
33 110 The PLATINUM trial will employ a systematic approach to investigate the use of  
34  
35 111 patiromer as an adjunct treatment in hyperkalaemic patients presenting to the ED.  
36  
37 112 The primary objective is to determine if patiromer, as adjunct to intravenous (IV)  
38  
39 113 insulin, glucose and inhaled beta-agonist therapy, lowers K<sup>+</sup> and reduces the need  
40  
41 114 for additional medical interventions for the management of hyperkalaemia.  
42  
43 115 Secondary objectives are to determine if adjunctive treatment with patiromer results  
44  
45 116 in fewer additional K<sup>+</sup>-related medical interventions, enables a sustained reduction in  
46  
47 117 K<sup>+</sup> without additional medical interventions, and leads to a sustained reduction in K<sup>+</sup>  
48  
49 118 24 hours after ED discharge.  
50  
51  
52  
53  
54  
55  
56  
57 119  
58  
59  
60

1  
2  
3  
4  
5  
6  
7  
8  
9  
10  
11  
12  
13  
14  
15  
16  
17  
18  
19  
20  
21  
22  
23  
24  
25  
26  
27  
28  
29  
30  
31  
32  
33  
34  
35  
36  
37  
38  
39  
40  
41  
42  
43  
44  
45  
46

120 **Methods and analysis**

121 **Study design**

122 This is a Phase 4, multicentre, randomised, double-blind, placebo-controlled, parallel-group study (NCT04443608, **Figure 1**). It is  
123 planned that PLATINUM will enrol approximately 300 participants with hyperkalaemia at about 30 ED sites in the US (**Figure 2**).  
124 The schedule of assessments is shown in **Table 1**.

125 *Impact of COVID-19*

126 To minimise the impact of staffing and institution challenges resulting from the COVID-19 pandemic on enrolment, the trial has  
127 been extended by more than two years. Additional efforts to maintain enrolment include: new and total enrolment counts being sent  
128 to each site on a weekly basis; increased communication with primary investigators at each site, as well as regular primary  
129 investigator and research staff teleconferencing; and increased reimbursement to cover unanticipated costs associated with the  
130 pandemic.

131 **Table 1. Assessment schedule during treatment period and follow-up**

| Procedures | Baseline              |               |               |               |               | Treatment Period               |  |                     |                       |  | Follow-up |  |
|------------|-----------------------|---------------|---------------|---------------|---------------|--------------------------------|--|---------------------|-----------------------|--|-----------|--|
|            | Assessment 1          | Assessment 2  | Assessment 3  | Assessment 4  | Assessment 5  | Assessment 6/ET                |  | Assessment 7        | Assessment 8          |  |           |  |
|            | Hour 0 <sup>(1)</sup> | Hour 2±15 min | Hour 4±15 min | Hour 6±15 min | Hour 8±15 min | Hour 10 or EoED <sup>(2)</sup> |  | Hour 0 +30–48 hours | EoED +14 days +3 days |  |           |  |

|                                                                     |   |                                                                  |   |   |   |                  |   |   |  |
|---------------------------------------------------------------------|---|------------------------------------------------------------------|---|---|---|------------------|---|---|--|
| <b>Informed consent</b>                                             | X |                                                                  |   |   |   |                  |   |   |  |
| <b>Eligibility criteria <sup>(3)</sup></b>                          | X |                                                                  |   |   |   |                  |   |   |  |
| <b>IWRS entry</b>                                                   | X |                                                                  |   |   |   |                  |   |   |  |
| <b>Demographics</b>                                                 | X |                                                                  |   |   |   |                  |   |   |  |
| <b>Medical/surgical history</b>                                     | X |                                                                  |   |   |   |                  |   |   |  |
| <b>Weight, height</b>                                               | X |                                                                  |   |   |   |                  |   |   |  |
| <b>Vital signs <sup>(4)</sup></b>                                   | X |                                                                  |   |   |   |                  |   |   |  |
| <b>Electrocardiogram</b>                                            | X |                                                                  | X |   |   |                  |   |   |  |
| <b>Potassium level <sup>(5)</sup></b>                               | X | X                                                                | X | X | X | X                | X |   |  |
| <b>Magnesium level</b>                                              | X |                                                                  |   | X |   |                  | X |   |  |
| <b>Pregnancy test (for female participants)</b>                     | X |                                                                  |   |   |   |                  |   |   |  |
| <b>Adverse events</b>                                               | X | X                                                                | X | X | X | X                | X | X |  |
| <b>Prior medications <sup>(6)</sup></b>                             | X |                                                                  |   |   |   |                  |   |   |  |
| <b>Concomitant medications</b>                                      | X | X                                                                | X | X | X | X                | X | X |  |
| <b>Randomisation</b>                                                | X |                                                                  |   |   |   |                  |   |   |  |
| <b>Administer study drug</b>                                        | X |                                                                  |   |   |   | X <sup>(7)</sup> |   |   |  |
| <b>Administer standard combination therapy (SCT) <sup>(8)</sup></b> | X | Potassium-related medical intervention as needed, but prefer SCT |   |   |   |                  |   |   |  |

132 1 Hour 0 is defined as the time of study drug administration (study drug needs to be administered within 60 mins of verifying eligible serum potassium and  
 133 administering SCT).

134 2 EoED defined as discharge from Emergency Department or initiation of dialysis, whichever occurs sooner.

135 3 Includes verbal check of pregnancy status for female participants. Pregnancy status to be confirmed for female participants via laboratory (blood or urine  
 136 samples acceptable) at Assessment 1.

137 4 Blood pressure, heart rate, pulse oximetry, respiratory rate, and temperature.

138 5 Obtained from the laboratory only, not point of care.

139 6 Up to 72 hours prior to baseline visit.

1  
2  
3 140 7 A study drug packet will be given to participants to prepare and take 24 hours after the first dose is administered.  
4  
5 141 8 SCT is defined as insulin (5 U administered as a bolus), glucose (25 g administered intravenously <15 minutes before the insulin), and aerosolised albuterol  
6  
7 142 (10 mg over 30 minutes) at baseline. Further potassium-related medical interventions, defined as additional administrations of insulin, glucose, or albuterol (or  
8  
9 143 their combination) at any dose, or any other potassium-lowering medication can be initiated and repeated at the discretion of the Investigator at any time;  
10  
11 144 however, SCT is preferred.  
12  
13 145 EoED, end of Emergency Department; ET, early termination; IWRS, Interactive Web Response System; SCT, standard combination therapy.  
14  
15  
16  
17  
18  
19  
20  
21  
22  
23  
24  
25  
26  
27  
28  
29  
30  
31  
32  
33  
34  
35  
36  
37  
38  
39  
40  
41  
42  
43  
44  
45  
46



1  
2  
3 146 Participants who are admitted to the ED with hyperkalaemia, provide informed  
4  
5 147 consent, and satisfy eligibility criteria, will be enrolled and undergo assessment.  
6  
7  
8 148 The treatment period will be from the completion of the baseline assessment until  
9  
10 149 discharge from the ED or initiation of dialysis, whichever occurs first. The expected  
11  
12 150 duration of subject participation is 15 days; the treatment period is up to 1 day, and  
13  
14 151 the follow-up period is 14 days. Participants who prematurely discontinue study drug  
15  
16 152 will remain in the study to be monitored and assessed for safety and efficacy. The  
17  
18 153 14-day follow-up will be conducted via a phone call. Additional K<sup>+</sup>-related medical  
19  
20 154 interventions, defined as post-baseline administration of insulin/glucose, with or  
21  
22 155 without albuterol, or any other K<sup>+</sup>-lowering medication, can be initiated and repeated  
23  
24 156 at any time during the treatment period at the discretion of the investigator or treating  
25  
26 157 team. However, a standard combination therapy (SCT) is encouraged if additional K<sup>+</sup>  
27  
28 158 related interventions are needed.  
29  
30  
31  
32  
33

34 159 The investigational drug was FDA approved before any enrolments took place.  
35  
36 160 However, insurance was obtained and maintained by the grantor and the sponsor to  
37  
38 161 ensure the consequences of any unanticipated complications could be mitigated.  
39  
40

## 41 162 **Participants**

42  
43 163 Eligible participants must be ≥18 years of age with hyperkalaemia, defined as K<sup>+</sup>  
44  
45 164 ≥5.8 mEq/L (chosen as the value where an intervention is required in the ED),  
46  
47 165 obtained via local laboratory or point-of-care testing. Exclusion criteria include  
48  
49 166 clinically significant arrhythmia, hemodynamic instability (defined as mean arterial  
50  
51 167 pressure ≤65 mmHg, or heart rate ≤40 or ≥125 beats per minute), hyperkalaemia  
52  
53 168 solely due to overdose of K<sup>+</sup> supplements, known bowel obstruction, treatment with  
54  
55 169 K<sup>+</sup> binders in the 7 days prior to enrolment, expected dialysis during the first 6 hours  
56  
57  
58 170 of study treatment or enrolment, known hypersensitivity to patiromer or its  
59  
60

1  
2  
3 171 ingredients, participation in any other investigational study <30 days prior to  
4  
5 172 screening, life expectancy <6 months, and pregnancy or breastfeeding.  
6  
7  
8 173

9  
10 174 **Study drug formulation**

11  
12 175 Patiromer sorbitex calcium (patiromer) or placebo (microcrystalline cellulose) will be  
13  
14 176 stored between 2 and 8°C and provided to the participant blinded, as a powder for  
15  
16  
17 177 oral suspension in packets.  
18

19  
20 178  
21 179 **Randomisation and treatment**

22  
23 180 Participants will be randomised 1:1 to 25.2 g of patiromer at baseline and 8.4 g  
24  
25 181 24 hours after the initial dose, or placebo, in addition to SCT, using permuted block  
26  
27 182 randomisation, stratified by baseline chronic dialysis status (on dialysis vs not on  
28  
29 183 dialysis). A maximum of 50% of participants will be on chronic dialysis.  
30  
31 184 Randomisation will be by a centralised list accessed electronically via an interactive  
32  
33 185 web response system at baseline. Immediately following baseline procedures and  
34  
35 186 randomisation, participants will be administered SCT consisting of glucose (25 g IV  
36  
37 187 <15 minutes before insulin) given if the blood sugar is below 400 mg/dL, insulin (5  
38  
39 188 units administered as an IV bolus), and aerosolised albuterol (10 mg over 30  
40  
41 189 minutes). Participants then receive a single oral dose of study drug (25.2 g) at  
42  
43 190 baseline (patiromer or placebo). Participants, site personnel, clinical providers and  
44  
45 191 the Sponsor will be blinded to the study drug. The clinical trial supply management  
46  
47 192 team will provide blinded sachets of patiromer and placebo, and the site  
48  
49 193 investigational pharmacists will maintain the blinding. In the case of a medical  
50  
51 194 emergency, the Investigator may request that the blind be broken if it is considered  
52  
53 195 important to the management of the medical emergency, or for study-specific  
54  
55 196 suspected unexpected serious adverse reaction (SUSAR) and aggregate safety  
56  
57  
58  
59  
60

1  
2  
3 197 reporting to Health Authorities. In such cases, the Investigator will be unblinded via  
4  
5 198 the IWRS. The study drug will be prepared immediately prior to administration and  
6  
7  
8 199 given at least 3 hours before or after other orally administered medications, if  
9  
10 200 possible, in the ED. Study drug will be mixed with water, apple juice, or cranberry  
11  
12 201 juice only. A second dose of the same study drug will be administered 24 hours after  
13  
14  
15 202 the initial dose.

16  
17 203

## 18 19 204 **Endpoints**

20  
21 205 The primary endpoint is the net clinical benefit, as previously described in a *post hoc*  
22  
23 206 analysis of the REDUCE study<sup>39</sup>, defined as the mean change in the number of  
24  
25  
26 207 interventions less the change in serum K<sup>+</sup>, at hour 6 between the groups (**Figure 3**).  
27  
28 208 Interventions consist of additional potassium-related medical interventions, defined  
29  
30 209 as post-baseline administration of insulin, glucose, or albuterol (or their combination)  
31  
32  
33 210 at any dose, or any other potassium-lowering medication provided to participants at  
34  
35 211 any time during the treatment period at the discretion of the Investigator.

36  
37 212 Assessment of the efficacy of K<sup>+</sup> binders in the ED can be confounded owing to  
38  
39 213 repeat administrations of insulin and/or albuterol. Therefore, net clinical benefit is  
40  
41 214 used to simultaneously assess both the number of additional potassium-lowering  
42  
43 215 medications required and the change in serum K<sup>+</sup>. Secondary endpoints are the net  
44  
45 216 clinical benefit at hour 4; the proportion of participants without post-baseline K<sup>+</sup>-  
46  
47 217 related medical interventions at hours 4, 6, and 8; the number of post-baseline K<sup>+</sup>-  
48  
49 218 related medical interventions up until hours 6 and 8, and ED discharge; the  
50  
51 219 proportion of participants with sustained K<sup>+</sup> reduction (defined as K<sup>+</sup> ≤5.5 mEq/L and  
52  
53  
54 220 4 hours without K<sup>+</sup>-related medical intervention) at hours 6 and 8; and serum K<sup>+</sup> 24  
55  
56 221 hours after ED discharge. An exploratory endpoint is the time to ED discharge.  
57  
58  
59  
60

1  
2  
3 222 Safety endpoints are the incidence and severity of AEs, and changes from baseline  
4  
5 223 in serum K<sup>+</sup>, magnesium, and electrocardiogram (ECG). AEs and concomitant  
6  
7 224 medications will be assessed every 2 hours after enrolment, until hour 10 or  
8  
9  
10 225 discharge from the ED; glucose checks are performed when clinically indicated by  
11  
12 226 the medical team (a glucose check is not required by the protocol) e.g., when a basic  
13  
14 227 metabolic panel is drawn for K<sup>+</sup> value, a glucose value will also be recorded.  
15  
16

17 228

### 19 229 **Statistical analysis**

20  
21 230 Based on the pilot study<sup>27</sup>, a power calculation determined that a sample size of 60  
22  
23 231 participants per treatment arm provides 90% power to detect a difference in NCB at  
24  
25 232 6 hours (primary outcome) between the placebo and patiromer groups at 2-sided  
26  
27 233  $\alpha=0.05$ . Accounting for a potential treatment discontinuation rate of 60% by 6 hours,  
28  
29 234 based on the nature of the disease and the need for emergent interventions beyond  
30  
31 235 this protocol, 150 participants per treatment arm will be enrolled to reach the  
32  
33 236 required sample size of 60 participants per arm for the final analysis.  
34  
35

36  
37  
38 237 The full analysis set (FAS) will consist of all participants who receive at least one  
39  
40 238 dose of randomised treatment and have at least two post-baseline assessments or a  
41  
42 239 4-hour post-baseline blood draw. The FAS will be used for the evaluation of efficacy.  
43  
44 240 The per-protocol set will consist of all participants who, in addition to the FAS criteria,  
45  
46 241 have no major protocol deviations. The safety set will consist of all randomised  
47  
48 242 participants who received at least one dose of study drug. Participants in the safety  
49  
50 243 set will be analysed based on the study drug they received.  
51  
52

53  
54 244 Net clinical benefit at hour 6 will be compared between groups using a Student's t-  
55  
56 245 test. A modified intention-to-treat analysis will be used for the primary endpoint, with  
57  
58 246 an imputation method applied for missing data: participants who have been on  
59  
60

1  
2  
3 247 placebo or patiomer for at least 4 hours will have the last observation carried  
4  
5 248 forward to the hour 6 analysis. Secondary endpoints involving proportions of  
6  
7 249 participants and counts of interventions will be analysed using the Cochran-Mantel-  
8  
9 250 Haenszel method. Continuous variables ( $K^+$  level at specified time points) will be  
10  
11 251 analysed using analysis of covariance (ANCOVA) methods. Kaplan-Meier curves will  
12  
13 252 be used to analyse the time to ED discharge. Safety variables will consist of all AEs,  
14  
15 253 clinical laboratory test results (serum  $K^+$  and magnesium), clinically significant ECG  
16  
17 254 findings, and reasons for discontinuing study drug. Abnormal ECGs or other safety  
18  
19 255 assessments will qualify as an AE if they meet any of the following criteria; 1) it is  
20  
21 256 accompanied by clinical symptoms or leads to a diagnosis (in such case the  
22  
23 257 symptom or diagnosis will be recorded as an AE); 2) it results in a change in study  
24  
25 258 treatment (e.g. dosage modification, treatment interruption, or treatment  
26  
27 259 discontinuation); 3) it results in a medical intervention, a change in concomitant  
28  
29 260 therapy, or referral for further testing outside the protocol; 4) it is a clinically  
30  
31 261 significant abnormality, as judged by the investigator.  
32  
33  
34  
35  
36  
37  
38  
39  
40

## 41 263 **Data management**

42  
43 264 An independent Data and Safety Monitoring Board/Data Monitoring Committee will  
44  
45 265 not be established due to the short duration of the study. The integrity and quality of  
46  
47 266 subject data will be ensured by providing training and process instructions for the  
48  
49 267 completion of the eCRFs, performing quality control checks, conducting ongoing  
50  
51 268 clinical data review (including medical and safety reviews), and performing source  
52  
53 269 data verification and data reconciliation. The sponsor may conduct site monitoring  
54  
55 270 visits at regular intervals in accordance with FDA and ICH guidelines. The  
56  
57 271 Investigator will permit monitors to review and inspect facilities, and all records  
58  
59  
60

1  
2  
3 272 relevant to this study. The Investigator will arrange for the retention of all study  
4  
5 273 documentation (such as eCRF files or printed forms, research files, and master files)  
6  
7  
8 274 for the duration specified in their respective site contract or as specified by the  
9  
10 275 applicable Regulatory Authority, whichever is longer.  
11

## 12 276 **Patient and Public Involvement**

13  
14  
15 277 None.  
16  
17

18 278

## 19 279 **Ethics and dissemination**

20  
21  
22  
23 280 This study will be conducted according to the principles of the World Medical  
24  
25 281 Association's Declaration of Helsinki <sup>40</sup>, and the amended International Council for  
26  
27 282 Harmonisation Good Clinical Practice guidelines <sup>41</sup>. The informed consent form for  
28  
29 283 the study complies with the Declaration of Helsinki, federal regulations, and  
30  
31 284 International Council for Harmonisation guidelines; and was approved by the  
32  
33 285 appropriate Institutional Review Board (IRB), Ethics Committee or Independent  
34  
35 286 Ethics Committee. A copy of the consent form is shown in the supplement section  
36  
37 287 (Supplementary File 1). Participants will provide consent in writing to the Investigator  
38  
39 288 or an authorized associate prior to study entry. The protocol (version 1.0, 20<sup>th</sup> March  
40  
41 289 2020) was approved by a central IRB (#20201569) and subsequently by the local  
42  
43 290 IRB at each site. Each applicable Regulatory Authority/IRB/EC/IEC will review and  
44  
45 291 approve amendments prior to their implementation. Primary results will be published  
46  
47 292 in peer reviewed manuscripts promptly following study completion. All authors will  
48  
49 293 meet the ICJME requirements for authorship. A communications agency may  
50  
51 294 provide editing of that manuscript, as well as administrative support for journal  
52  
53 295 submission.  
54  
55  
56  
57  
58  
59  
60

1  
2  
3 296 Standard clinical trials information can be found on ClinicalTrials.gov  
4  
5 297 (NCT04443608). There are no plans to grant public access to the participant-level  
6  
7  
8 298 data set or statistical code.  
9  
10  
11  
12  
13  
14  
15  
16  
17  
18  
19  
20  
21  
22  
23  
24  
25  
26  
27  
28  
29  
30  
31  
32  
33  
34  
35  
36  
37  
38  
39  
40  
41  
42  
43  
44  
45  
46  
47  
48  
49  
50  
51  
52  
53  
54  
55  
56  
57  
58  
59  
60

For peer review only

## 299 Discussion

300 Although hyperkalaemia is common and potentially life-threatening, there is no  
301 standardised ED treatment protocol<sup>1-3 15</sup>. The efficacy and safety of many  
302 hyperkalaemia treatments are not well established in the ED, resulting in a  
303 considerable variation in treatment, which is not only detrimental to patients but  
304 hampers the ability to perform comparative assessments of the benefit of novel  
305 therapies.

306 The PLATINUM study will assess the benefit of adding patiromer to an SCT regimen:  
307 glucose (25 g IV <15 minutes before insulin), insulin (5 U administered as an IV  
308 bolus), and aerosolised albuterol (10 mg over 30 minutes). As some SCT agents  
309 temporarily shift K<sup>+</sup> into the cells repeat administration is commonly required to  
310 prevent rebound in serum K<sup>+</sup> levels, increasing the risk of AEs<sup>15-19 25 42 43</sup>. In  
311 contrast, patiromer removes K<sup>+</sup> via binding in the gastrointestinal tract<sup>37</sup>. Of note, the  
312 PLATINUM study will use 5 U of insulin, as this has similar efficacy to 10 U<sup>42</sup>.

313 Recently, a retrospective cohort study of 881 unique encounters from emergency  
314 departments, inpatient units, and intensive care units, reported that a single dose of  
315 patiromer monotherapy was associated with a significant reduction from baseline in  
316 serum K<sup>+</sup> in non-emergent hyperkalaemia<sup>44</sup>. An open-label, pilot study in  
317 participants randomised to standard of care (SOC) (according to individual practice  
318 pattern or hospital protocol) versus 25.2 g of patiromer plus SOC demonstrated a  
319 reduction in serum K<sup>+</sup> within 2 hours of with the addition of patiromer; however,  
320 reduction in K<sup>+</sup> was not statistically significant at 6 hours, likely due to the small  
321 sample size and large variability in mean change in serum K<sup>+</sup><sup>27</sup>.



1  
2  
3 322 In a *post hoc* analysis of the REDUCE study<sup>39</sup>, net clinical benefit was utilised to  
4  
5 323 evaluate the efficacy of patiromer plus SOC, compared to SOC alone. Net clinical  
6  
7 324 benefit was defined as the mean change in the number of additional interventions,  
8  
9  
10 325 less the mean change in serum K<sup>+</sup>. This novel method of assessing the effect of K<sup>+</sup>  
11  
12 326 binders considers the overall benefit of both lowering serum K<sup>+</sup> and simultaneously  
13  
14 327 reducing the number of interventions required. Hence, net clinical benefit combines  
15  
16  
17 328 two potential merits of a novel agent and will also be useful in future trials as a  
18  
19 329 method to investigate the effect of K<sup>+</sup> binders to treat hyperkalaemia.

20  
21  
22 330 The secondary endpoint, serum K<sup>+</sup> 24 hours after ED discharge, will provide insight  
23  
24 331 on the value of giving a second dose of patiromer at discharge from the ED.  
25  
26 332 Importantly, this study may support a standardised care algorithm with consistent  
27  
28  
29 333 dosing, reporting efficacy and safety data from a large, randomised, multi-centre trial.  
30  
31  
32 334 The protocol has several limitations. First, subjects with hyperkalaemia are invariably  
33  
34 335 critically ill and the ED is a challenging environment for enrolment in interventional  
35  
36 336 trials and so the attrition rate is expected to be high. Second, standard-of care in  
37  
38 337 hyperkalaemia is not well defined and in the absence of guidelines it will be difficult  
39  
40  
41 338 to control the standard-of-care treatment regimen. Lastly, a successful enrolment  
42  
43 339 requires an eligible K<sup>+</sup>, signed consent and administration of both SOC treatment  
44  
45 340 and investigational drug to occur within sixty minutes and that time window can be  
46  
47  
48 341 challenging.

49  
50  
51 342 The PLATINUM study started enrolment in October 2020 and is expected to end  
52  
53 343 May 2023. It is the largest ED randomised controlled hyperkalaemia trial ever  
54  
55  
56 344 performed, with the opportunity to assess a standardised approach to hyperkalaemia  
57  
58  
59  
60

1  
2  
3  
4  
5  
6  
7  
8  
9  
10  
11  
12  
13  
14  
15  
16  
17  
18  
19  
20  
21  
22  
23  
24  
25  
26  
27  
28  
29  
30  
31  
32  
33  
34  
35  
36  
37  
38  
39  
40  
41  
42  
43  
44  
45  
46  
47  
48  
49  
50  
51  
52  
53  
54  
55  
56  
57  
58  
59  
60

345 management, as well as establish a new evaluation parameter, the net clinical  
346 benefit, for acute hyperkalaemia treatment investigations.

For peer review only

1  
2  
3 347 **Acknowledgements**  
4  
5

6 348 This work was executed by Comprehensive Research Associates, LLC (Texas,  
7  
8 349 USA). Medical writing support was provided by AXON Communications, United  
9  
10 350 Kingdom, and funded by CSL Vifor.  
11  
12

13 351  
14

15 352 **Funding**  
16  
17

18 353 This work was funded by Vifor Fresenius Medical Care Renal Pharma Ltd.,  
19  
20 354 Glattbrugg, Switzerland. The study was conceived by the primary investigator (ZR)  
21  
22 355 and co-authors. Funding sources did not influence the study design, implementation,  
23  
24 356 or interpretation or reporting of results  
25  
26

27 357  
28  
29

30 358 **Licence Statement**  
31  
32

33 359 I, the Submitting Author has the right to grant and does grant on behalf of all authors  
34  
35 360 of the Work (as defined in the author licence), an exclusive licence and/or a non-  
36  
37 361 exclusive licence for contributions from authors who are: i) UK Crown employees; ii)  
38  
39 362 where BMJ has agreed a CC-BY licence shall apply, and/or iii) in accordance with  
40  
41 363 the terms applicable for US Federal Government officers or employees acting as part  
42  
43 364 of their official duties; on a worldwide, perpetual, irrevocable, royalty-free basis to  
44  
45 365 BMJ Publishing Group Ltd ("BMJ") its licensees.  
46  
47  
48  
49  
50  
51  
52  
53  
54  
55  
56  
57  
58  
59  
60

1  
2  
3 **366 Contributors**  
4  
5

6 367 ZR: Creating the protocol, interpretation of data, editing the manuscript.  
7

8 368 JB: Interpretation of data, editing the manuscript.  
9

10 369 CMQ: Interpretation of data, editing the manuscript.  
11

12 370 YD: Site investigator, interpretation of data, editing the manuscript.  
13

14 371 BS: Site investigator, acquisition and interpretation of data, editing the manuscript.  
15

16 372 JJB: Site investigator, data collection, interpretation of data, editing the manuscript.  
17

18 373 BED: Site investigator, data collection, interpretation of data, editing the manuscript.  
19

20 374 CAH: Contributed to protocol (study design), editing the manuscript.  
21

22 375 MRW: Contributed to protocol, interpretation of data, editing the manuscript.  
23

24 376 AJS: Contributed to protocol, interpretation of data, editing the manuscript.  
25

26 377 SB: Site investigator, data collection, interpretation of data, editing the manuscript.  
27

28 378 KMS-R: Creating the protocol, data collection and management, interpretation of  
29

30 379 data, editing the manuscript.  
31

32 380 WFP: Creating the protocol, obtaining co-funding, editing the manuscript.  
33

34 381 All authors will have access to the final trial dataset. There are no contractual  
35

36 382 agreements limiting such access.  
37

38 383  
39  
40  
41  
42

43 **384 Competing interests**  
44  
45

46 385 ZR: Advisory board memberships (Cardiorenal disease) for AstraZeneca and CSL  
47

48 386 Vifor.  
49

50 387 JB: Employee and shareholder of CSL Vifor.  
51

52 388 CMQ: Employee and shareholder of CSL Vifor.  
53

54 389 YD: No relevant conflicts of interest to disclose.  
55

56 390 BS: NHLBI, CDC, Comprehensive Research Associates (institutional grants).  
57  
58  
59  
60

1  
2  
3 391 JJB: No relevant conflicts of interest to disclose.  
4  
5 392 BED: No relevant conflicts of interest to disclose.  
6  
7 393 CAH: Personal fees (consultant) from AstraZeneca, Bayer, Diamedica, FibroGen,  
8  
9 394 Merck, NxStage, Pfizer, Relypsa, University of Oxford, Bristol Myers Squibb; Grants  
10  
11 395 from the University of British Columbia and Bristol Myers Squibb, and the National  
12  
13 396 Institutes of Health (NIDDK and NHLBI), and author royalties from UpToDate. Stock  
14  
15 397 ownership in Johnson&Johnson, Merck, and Pfizer. Employee of Hennepin  
16  
17 398 Healthcare.  
18  
19 399 MRW: Consulting fees: CSL Vifor and AstraZeneca. Honoraria: CSL Vifor.  
20  
21  
22 400 AJS: Research grants: Comprehensive Research Associates. Consulting fees:  
23  
24 401 AstraZeneca.  
25  
26  
27 402 SB: No relevant conflicts of interest to disclose.  
28  
29 403 KMS-R: No relevant conflicts of interest to disclose.  
30  
31 404 WFP: Research Grants: Brainbox, Instrument Labs, Salix. Consultant: Abbott,  
32  
33 405 Brainbox, Instrument Labs, Janssen, Osler, Roche, Siemens, CSL Vifor.  
34  
35 406 Stock/Ownership Interests: AseptiScope Inc, Brainbox Inc, Braincheck Inc, Coagulo  
36  
37 407 Inc, Comprehensive Research Associates LLC, Comprehensive Research  
38  
39 408 Management Inc, Emergencies in Medicine LLC, Fast Inc, Forrest Devices, Ischemia  
40  
41 409 DX LLC, Lucia Inc, Prevencio Inc, RCE Technologies, ROMTech, ScPharma,  
42  
43 410 Trivirum Inc, Upstream Inc.  
44  
45  
46 411  
47  
48  
49  
50  
51  
52  
53  
54 412  
55  
56  
57  
58  
59  
60

413 **References**

1. Lemoine L, Le Bastard Q, Batard E, et al. An Evidence-Based Narrative Review of the Emergency Department Management of Acute Hyperkalemia. *J Emerg Med* 2021;60(5):599-606. doi: 10.1016/j.jemermed.2020.11.028 [published Online First: 2021/01/12]
2. Lindner G, Burdmann EA, Clase CM, et al. Acute hyperkalemia in the emergency department: a summary from a Kidney Disease: Improving Global Outcomes conference. *Eur J Emerg Med* 2020;27(5):329-37. doi: 10.1097/mej.0000000000000691 [published Online First: 2020/08/28]
3. Singer AJ, Thode HC, Jr., Peacock WF. A retrospective study of emergency department potassium disturbances: severity, treatment, and outcomes. *Clin Exp Emerg Med* 2017;4(2):73-79. doi: 10.15441/ceem.16.194 [published Online First: 2017/07/19]
4. Quality AfHRA. Trends in Prevalence and Control of Hypertension According to the 2017 American College of Cardiology/American Heart Association (ACC/AHA) Guideline.
5. Hunter RW, Bailey MA. Hyperkalemia: pathophysiology, risk factors and consequences. *Nephrol Dial Transplant* 2019;34(Suppl 3):iii2-iii11. doi: 10.1093/ndt/gfz206 [published Online First: 2019/12/05]
6. Lv JC, Zhang LX. Prevalence and Disease Burden of Chronic Kidney Disease. *Adv Exp Med Biol* 2019;1165:3-15. doi: 10.1007/978-981-13-8871-2\_1 [published Online First: 2019/08/11]
7. Bansal S, Pergola PE. Current Management of Hyperkalemia in Patients on Dialysis. *Kidney Int Rep* 2020;5(6):779-89. doi: 10.1016/j.ekir.2020.02.1028 [published Online First: 2020/06/11]
8. Savarese G, Becher PM, Lund LH, et al. Global burden of heart failure: A comprehensive and updated review of epidemiology. *Cardiovasc Res* 2022 doi: 10.1093/cvr/cvac013 [published Online First: 2022/02/13]
9. Dorans KS, Mills KT, Liu Y, et al. Trends in Prevalence and Control of Hypertension According to the 2017 American College of Cardiology/American Heart Association (ACC/AHA) Guideline. *J Am Heart Assoc* 2018;7(11) doi: 10.1161/jaha.118.008888 [published Online First: 2018/06/03]
10. Davis J, Israni R, Betts KA, et al. Real-World Management of Hyperkalemia in the Emergency Department: An Electronic Medical Record Analysis. *Adv Ther* 2021 doi: 10.1007/s12325-021-02017-w [published Online First: 2021/12/28]
11. Rafique Z, Weir MR, Onuigbo M, et al. Expert Panel Recommendations for the Identification and Management of Hyperkalemia and Role of Patiromer in Patients with Chronic Kidney Disease and Heart Failure. *J Manag Care Spec Pharm* 2017;23(4-a Suppl):S10-s19. doi: 10.18553/jmcp.2017.23.4-a.s10 [published Online First: 2017/05/10]
12. Rafique Z, Chouihed T, Mebazaa A, et al. Current treatment and unmet needs of hyperkalaemia in the emergency department. *Eur Heart J Suppl* 2019;21(Suppl A):A12-a19. doi: 10.1093/eurheartj/suy029 [published Online First: 2019/03/07]
13. Rafique Z, Peacock F, Armstead T, et al. Hyperkalemia management in the emergency department: An expert panel consensus. *J Am Coll Emerg Physicians Open* 2021;2(5):e12572. doi: 10.1002/emp2.12572 [published Online First: 2021/10/12]
14. Rossignol P, Legrand M, Kosiborod M, et al. Emergency management of severe hyperkalemia: Guideline for best practice and opportunities for the future. *Pharmacol Res* 2016;113(Pt A):585-91. doi: 10.1016/j.phrs.2016.09.039 [published Online First: 2016/10/21]
15. Peacock WF, Rafique Z, Clark CL, et al. Real World Evidence for Treatment of Hyperkalemia in the Emergency Department (REVEAL-ED): A Multicenter, Prospective, Observational Study. *J Emerg Med* 2018;55(6):741-50. doi: 10.1016/j.jemermed.2018.09.007 [published Online First: 2018/11/06]
16. Aljabri A, Perona S, Alshibani M, et al. Blood glucose reduction in patients treated with insulin and dextrose for hyperkalaemia. *Emerg Med J* 2020;37(1):31-35. doi: 10.1136/emered-2019-208744 [published Online First: 2019/10/28]

- 1  
2  
3 462 17. Farina N, Anderson C. Impact of dextrose dose on hypoglycemia development following  
4 463 treatment of hyperkalemia. *Ther Adv Drug Saf* 2018;9(6):323-29. doi:  
5 464 10.1177/2042098618768725 [published Online First: 2018/06/02]
- 6 465 18. Jacobi J, Bircher N, Krinsley J, et al. Guidelines for the use of an insulin infusion for the  
7 466 management of hyperglycemia in critically ill patients. *Crit Care Med* 2012;40(12):3251-76.  
8 467 doi: 10.1097/CCM.0b013e3182653269 [published Online First: 2012/11/21]
- 9 468 19. Scott NL, Klein LR, Cales E, et al. Hypoglycemia as a complication of intravenous insulin to treat  
10 469 hyperkalemia in the emergency department. *Am J Emerg Med* 2019;37(2):209-13. doi:  
11 470 10.1016/j.ajem.2018.05.016 [published Online First: 2018/06/05]
- 12 471 20. Boughton CK, Dixon D, Goble E, et al. Preventing Hypoglycemia Following Treatment of  
13 472 Hyperkalemia in Hospitalized Patients. *J Hosp Med* 2019;14(5):284-87. doi:  
14 473 10.12788/jhm.3145 [published Online First: 2019/02/23]
- 15 474 21. Piña IL, Yuan J, Ackourey G, et al. Effect of patiromer on serum potassium in hyperkalemic  
16 475 patients with heart failure: Pooled analysis of 3 randomized trials. *Prog Cardiovasc Dis*  
17 476 2020;63(5):656-61. doi: 10.1016/j.pcad.2020.09.007 [published Online First: 2020/10/03]
- 18 477 22. United States Food and Drug Administration. VELTASSA - patiromer powder, for suspension. Full  
19 478 prescribing information.
- 20 479 23. European Medicines Agency. Veltassa powder for oral suspension. Summary of product  
21 480 characteristics.
- 22 481 24. Mahoney BA, Smith WA, Lo DS, et al. Emergency interventions for hyperkalaemia. *Cochrane*  
23 482 *Database Syst Rev* 2005;2005(2):Cd003235. doi: 10.1002/14651858.CD003235.pub2  
24 483 [published Online First: 2005/04/23]
- 25 484 25. Moussavi K, Garcia J, Tellez-Corrales E, et al. Reduced alternative insulin dosing in hyperkalemia:  
26 485 A meta-analysis of effects on hypoglycemia and potassium reduction. *Pharmacotherapy*  
27 486 2021;41(7):598-607. doi: 10.1002/phar.2596 [published Online First: 2021/05/17]
- 28 487 26. Peacock WF, Rafique Z, Vishnevskiy K, et al. Emergency Potassium Normalization Treatment  
29 488 Including Sodium Zirconium Cyclosilicate: A Phase II, Randomized, Double-blind, Placebo-  
30 489 controlled Study (ENERGIZE). *Acad Emerg Med* 2020;27(6):475-86. doi: 10.1111/acem.13954  
31 490 [published Online First: 2020/03/10]
- 32 491 27. Rafique Z, Liu M, Staggers KA, et al. Patiromer for Treatment of Hyperkalemia in the Emergency  
33 492 Department: A Pilot Study. *Acad Emerg Med* 2020;27(1):54-60. doi: 10.1111/acem.13868  
34 493 [published Online First: 2019/10/11]
- 35 494 28. Sodium Polystyrene Sulfonate (Kayexalate) [prescribing information].
- 36 495 29. Administration USFaD. Sodium polystyrene sulfonate prescribing information.
- 37 496 30. Chaitman M, Dixit D, Bridgeman MB. Potassium-Binding Agents for the Clinical Management of  
38 497 Hyperkalemia. *P t* 2016;41(1):43-50. [published Online First: 2016/01/15]
- 39 498 31. Blair HA. Patiromer: A Review in Hyperkalaemia. *Clin Drug Investig* 2018;38(8):785-94. doi:  
40 499 10.1007/s40261-018-0675-8 [published Online First: 2018/07/22]
- 41 500 32. Ali W, Bakris G. Evolution of Patiromer Use: a Review. *Curr Cardiol Rep* 2020;22(9):94. doi:  
42 501 10.1007/s11886-020-01342-w [published Online First: 2020/07/11]
- 43 502 33. Bakris GL, Pitt B, Weir MR, et al. Effect of Patiromer on Serum Potassium Level in Patients With  
44 503 Hyperkalemia and Diabetic Kidney Disease: The AMETHYST-DN Randomized Clinical Trial.  
45 504 *Jama* 2015;314(2):151-61. doi: 10.1001/jama.2015.7446 [published Online First:  
46 505 2015/07/15]
- 47 506 34. Bushinsky DA, Williams GH, Pitt B, et al. Patiromer induces rapid and sustained potassium  
48 507 lowering in patients with chronic kidney disease and hyperkalemia. *Kidney Int*  
49 508 2015;88(6):1427-33. doi: 10.1038/ki.2015.270 [published Online First: 2015/09/17]
- 50 509 35. Weir MR, Bakris GL, Bushinsky DA, et al. Patiromer in patients with kidney disease and  
51 510 hyperkalemia receiving RAAS inhibitors. *N Engl J Med* 2015;372(3):211-21. doi:  
52 511 10.1056/NEJMoa1410853 [published Online First: 2014/11/22]



- 1  
2  
3 512 36. Pitt B, Anker SD, Bushinsky DA, et al. Evaluation of the efficacy and safety of RLY5016, a  
4 513 polymeric potassium binder, in a double-blind, placebo-controlled study in patients with  
5 514 chronic heart failure (the PEARL-HF) trial. *Eur Heart J* 2011;32(7):820-8. doi:  
6 515 10.1093/eurheartj/ehq502 [published Online First: 2011/01/07]  
7  
8 516 37. Li L, Harrison SD, Cope MJ, et al. Mechanism of Action and Pharmacology of Patiromer, a  
9 517 Nonabsorbed Cross-Linked Polymer That Lowers Serum Potassium Concentration in Patients  
10 518 With Hyperkalemia. *J Cardiovasc Pharmacol Ther* 2016;21(5):456-65. doi:  
11 519 10.1177/1074248416629549 [published Online First: 2016/02/10]  
12 520 38. Canas AE, Troutt HR, Jiang L, et al. A randomized study to compare oral potassium binders in the  
13 521 treatment of acute hyperkalemia. *BMC Nephrol* 2023;24(1):89. doi: 10.1186/s12882-023-  
14 522 03145-x [published Online First: 2023/04/05]  
15 523 39. Rafique Z, Budden J, Boone S, et al. SAEM22 Abstracts: Net Clinical Benefit of Patiromer: A Post  
16 524 Hoc Analysis of the REDUCE Trial. *Academic Emergency Medicine* 2022;29:S8-S429.  
17 525 40. World Medical Association. World Medical Association Declaration of Helsinki: ethical principles  
18 526 for medical research involving human subjects. *Jama* 2013;310(20):2191-4. doi:  
19 527 10.1001/jama.2013.281053 [published Online First: 2013/10/22]  
20 528 41. International Council for Harmonisation of Technical Requirements for Registration of  
21 529 Pharmaceuticals for Human Use (ICH). ICH harmonised guideline. Guideline for good clinical  
22 530 practice E6(R2). In: ICH, ed., 2017.  
23 531 42. Pierce DA, Russell G, Pirkle JL, Jr. Incidence of Hypoglycemia in Patients With Low eGFR Treated  
24 532 With Insulin and Dextrose for Hyperkalemia. *Ann Pharmacother* 2015;49(12):1322-6. doi:  
25 533 10.1177/1060028015607559 [published Online First: 2015/09/30]  
26 534 43. Humphrey TJL, James G, Wilkinson IB, et al. Clinical outcomes associated with the emergency  
27 535 treatment of hyperkalaemia with intravenous insulin-dextrose. *Eur J Intern Med* 2022;95:87-  
28 536 92. doi: 10.1016/j.ejim.2021.09.018 [published Online First: 2021/10/10]  
29 537 44. Di Palo KE, Sinnott MJ, Goriacko P. Assessment of Patiromer Monotherapy for Hyperkalemia in  
30 538 an Acute Care Setting. *JAMA Netw Open* 2022;5(1):e2145236. doi:  
31 539 10.1001/jamanetworkopen.2021.45236 [published Online First: 2022/01/27]  
32  
33  
34  
35 540  
36  
37 541  
38  
39  
40  
41  
42  
43  
44  
45  
46  
47  
48  
49  
50  
51  
52  
53  
54  
55  
56  
57  
58  
59  
60



1  
2  
3 **542 Figure legends**  
4

5  
6 **543 Figure 1. PLATINUM study design**  
7

8  
9 544 \*Local laboratory or point-of-care testing may be utilised to confirm eligibility for the  
10  
11 545 study. Potassium testing can be repeated at the discretion of the Investigator at any  
12  
13 546 time during the treatment period but is required at hour 4.  
14  
15 547 ED, Emergency Department; EoED, end of Emergency Department stay (defined as  
16  
17 548 discharge from the ED or initiation of dialysis); SCT, standard combination therapy  
18  
19 549 (defined as 5 U intravenous insulin, 25 g intravenous glucose, and 10 mg  
20  
21 550 aerosolised albuterol) and potassium-related medical intervention (defined as  
22  
23 551 additional administration of insulin, glucose, or albuterol [or their combination] at any  
24  
25 552 dose, or any other potassium-lowering medication can be initiated and repeated at  
26  
27 553 the discretion of the Investigator at any time); however, SCT is recommended.  
28  
29  
30

31  
32  
33 **554 Figure 2. Proposed study centre locations**  
34

35  
36 555 Study centres actively enrolling participants are shown on map. 1) Stanford  
37  
38 556 University School of Medicine, California; 2) Henry JN Taub Hospital/Baylor College  
39  
40 557 of Medicine, Texas; 3) Hennepin County Medical Center. University of Minnesota,  
41  
42 558 Minnesota; 4) Stony Brook University Hospital, Stony Brook, New York; 5) Yale  
43  
44 559 University, Connecticut; 6) Henry Ford Hospital, Michigan; 7) University of Cincinnati,  
45  
46 560 Ohio; 8) Wake Forest University, North Carolina; 9) The Ohio State University  
47  
48 561 Wexner Medical Center, Ohio; 10) Baystate Health, Massachusetts; 11) Washington  
49  
50 562 University in St. Louis, Missouri; 12) UT Memorial Hermann Hospital, Texas Medical  
51  
52 563 Center, Texas; 13) Mt Sinai. Icahn School of Medicine, New York; 14) Cristiana  
53  
54 564 Care, Wilmington, Delaware; 15) University of Kansas Medical Center, Kansas; 16)  
55  
56  
57  
58  
59  
60

1  
2  
3 565 Meritus Medical Center, Maryland; 17) George Washington University, Washington

4  
5 566 D.C.

6  
7  
8 567 **Figure 3. Primary endpoint: net clinical benefit**

9  
10  
11 568 ‡ Number of additional potassium (K<sup>+</sup>) lowering interventions after initial treatment.

12  
13 569 ΔK will be determined from laboratory potassium (K<sup>+</sup>) values.  
14  
15  
16  
17  
18  
19  
20  
21  
22  
23  
24  
25  
26  
27  
28  
29  
30  
31  
32  
33  
34  
35  
36  
37  
38  
39  
40  
41  
42  
43  
44  
45  
46  
47  
48  
49  
50  
51  
52  
53  
54  
55  
56  
57  
58  
59  
60

For peer review only

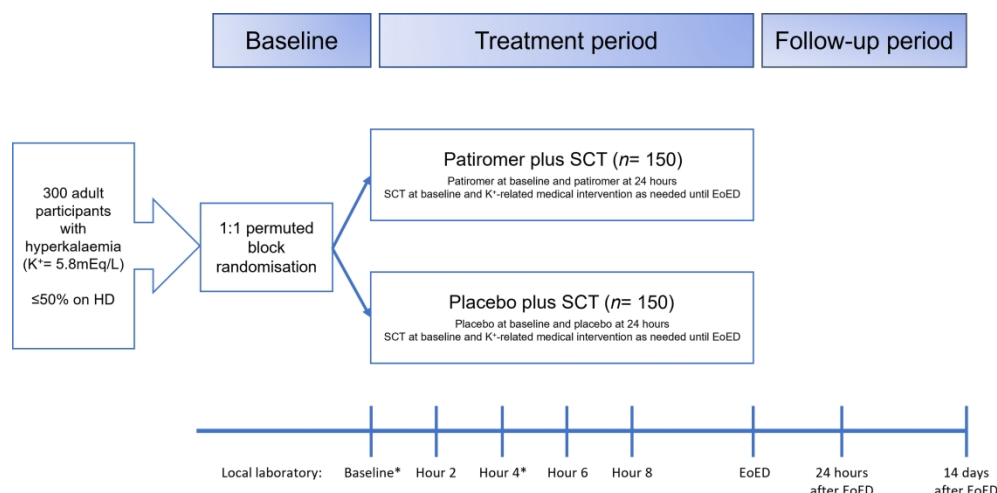

**Figure 1. PLATINUM study design**\*Local laboratory or point-of-care testing may be utilised to confirm eligibility for the study. Potassium testing can be repeated at the discretion of the Investigator at any time during the treatment period but is required at hour 4. ED, Emergency Department; EoED, end of Emergency Department stay (defined as discharge from the ED or initiation of dialysis); SCT, standard combination therapy (defined as 5 U intravenous insulin, 25 g intravenous glucose, and 10 mg aerosolised albuterol) and potassium-related medical intervention (defined as additional administration of insulin, glucose, or albuterol [or their combination] at any dose, or any other potassium-lowering medication can be initiated and repeated at the discretion of the Investigator at any time); however, SCT is recommended.

262x129mm (300 x 300 DPI)

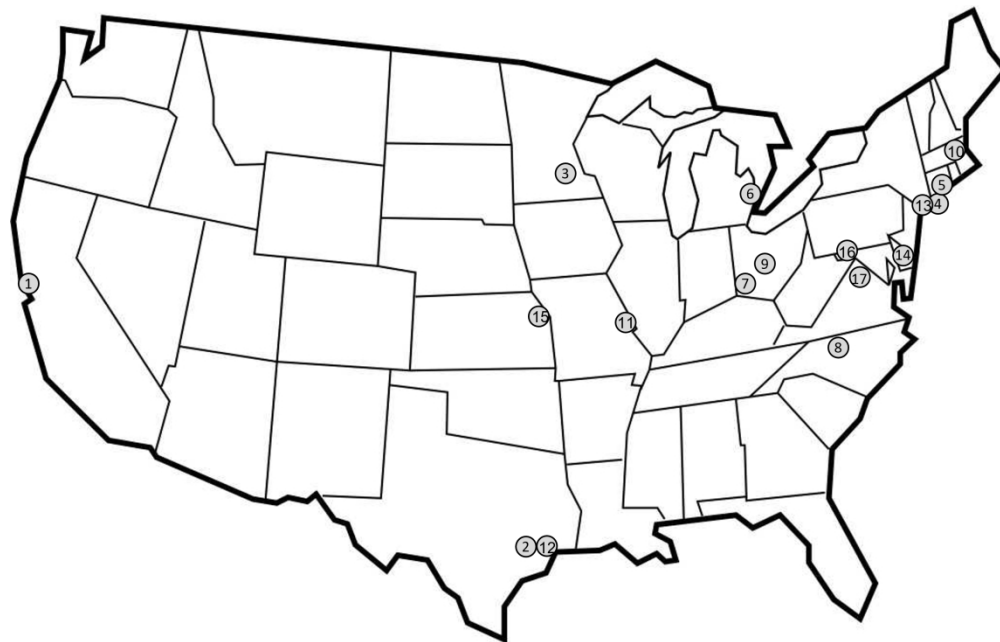

**Figure 2. Proposed study centre locations.**

Study centres actively enrolling participants are shown on map. 1) Stanford University School of Medicine, California; 2) Henry JN Taub Hospital/Baylor College of Medicine, Texas; 3) Hennepin County Medical Center. University of Minnesota, Minnesota; 4) Stony Brook University Hospital, Stony Brook, New York; 5) Yale University, Connecticut; 6) Henry Ford Hospital, Michigan; 7) University of Cincinnati, Ohio; 8) Wake Forest University, North Carolina; 9) The Ohio State University Wexner Medical Center, Ohio; 10) Baystate Health, Massachusetts; 11) Washington University in St. Louis, Missouri; 12) UT Memorial Hermann Hospital, Texas Medical Center, Texas; 13) Mt Sinai. Icahn School of Medicine, New York; 14) Cristiana Care, Wilmington, Delaware; 15) University of Kansas Medical Center, Kansas; 16) Meritus Medical Center, Maryland; 17) George Washington University, Washington D.C.

247x157mm (330 x 330 DPI)

$$\text{Net Clinical Benefit} = (\text{interventions}^{\ddagger} - \Delta\text{K})_{6\text{hr}}$$

**Figure 3. Primary Endpoint: net clinical benefit<sup>‡</sup>** Number of additional potassium (K+) lowering interventions after initial treatment.  $\Delta\text{K}$  will be determined from laboratory potassium (K+) values.

126x21mm (300 x 300 DPI)

IRB Approved Template  
MUST BE APPROVED  
FOR SITES BEFORE USE  
Jun 18, 2020

**RESEARCH SUBJECT CONSENT FORM  
AND  
AUTHORIZATION TO DISCLOSE HEALTH INFORMATION**

**TITLE:** A Multicenter, Randomized, Double-blind, Placebo-controlled, Parallel Group Phase 4 Study of the Efficacy and Safety of Patiromer for Oral Suspension in Combination with Standard of Care Treatment in Emergency Department Patients with Hyperkalemia

**SHORT TITLE:** Patiromer Utility as an Adjunct Treatment in Patients Needing Urgent Hyperkalemia Management (PLATINUM)

**PROTOCOL NO.:** CRA-US-001  
WIRB<sup>®</sup> Protocol #20201569

**SPONSOR:** Comprehensive Research Associates

**INVESTIGATOR:** Name  
Address  
City, State, Zip  
Country

**STUDY-RELATED  
PHONE NUMBER(S):** Phone Number  
Phone Number (24 hours)  
[24 hour number is required]

You are being asked for your consent to take part in a research study. This document provides a summary of this research. It describes the key information that we believe most people need in order to decide whether to take part in this research.

Please read this form carefully. Take time to ask as many questions about the study (also called, 'trial') as you would like. The study staff can explain words or information that you do not understand. Reading this form and talking to the study staff may help you decide whether to take part or not. If you decide to take part in this study, you must sign your name at the end of this form. You cannot take part in this research study if you do not sign this form.

**What should I know about this research?**

- Someone will explain this research to you.
- Taking part in this research is voluntary. Whether you take part is up to you.
- You can choose not to take part. There will be no penalty or loss of benefits to which you are otherwise entitled if you decide to not participate.

IRB Approved Template  
MUST BE APPROVED  
FOR SITES BEFORE USE  
Jun 18, 2020

- You can agree to take part and later change your mind. There will be no penalty or loss of benefits to which you are otherwise entitled if you decide to withdraw your participation, even if you have already started participation.
- If you don't understand, ask questions.
- Ask all the questions you want before you decide.

### **Why is this research being done?**

You are being asked to take part in a clinical research trial because you have been found to have an elevated potassium level in your blood, also known as hyperkalemia. The reason for the study is to find more effective treatments for elevated blood potassium. Clinical trials are a type of research to help doctors find ways to improve health and medical care.

This research study is being conducted by Comprehensive Research Associates. (CRA), also known as the study Sponsor. [Institution] is being paid by CRA to conduct this study.

The purpose of this research is to see if a drug, called patiomer, already approved by the U.S Food and Drug Administration (FDA), can help lower potassium while patients are in the emergency department.

Before you decide whether to take part, you should understand the possible benefits and risks associated with this study. You will be able to ask the staff any questions you may have. This consent form is designed to explain that information to you. Taking part in this study is entirely voluntary.

About 300 patients with hyperkalemia, across the US will take part in this research.

### **How long will I be in this research?**

If you decide to take part in the study, you will not be asked to spend time in the hospital that you would not be spending anyway due to your diagnosis of hyperkalemia (high potassium).

The treatment period, i.e., expected duration of the ED stay, is up to 1 day and the follow-up period is 14 days (+3 days). The total duration of your participation in the study is anticipated to be 15 days (about 2 weeks).

### **What happens to me if I agree to take part in this research?**

If you agree to take part, study staff will look at your records, ask you questions and may do a blood test to see if this study is right for you.

If this study is right for you, you will start the study. It will be decided by chance, using a computer, if you will receive active study drug (patiomer) plus standard of care treatment for your condition or placebo (not active) study drug plus standard of care of care treatment. You have an equal chance of receiving placebo or patiomer with standard of care treatment. During

the research, you and your study doctor will not know which group you are in, but your doctor can find out in case of an emergency.

### **Baseline:**

- The study drug will be given to you to take by mouth.
- The study staff will assess your overall health, review your medical history, signs and symptoms you had at check-in to the emergency room, including any medications you may be taking or have taken in the past 3 days.
- The study staff will record your blood pressure, breathing rate, pulse, temperature, the level of oxygen in your blood, height, and weight.
- Blood may be taken for testing if it was not already done as part of your routine care to check your general health
- If you are female and able to have children, a pregnancy test will be done.
- A 12-lead electrocardiogram will be done, if not already done as part of your care, this procedure records the electric signals in your heart. It is done by placing sticky pads on your chest and limbs and produces a paper tracing.

### **Treatment**

The treatment phase will last until you leave the emergency department, receive dialysis (if needed) or have been in the emergency department for 10 hours.

- Your doctor will periodically check your electrolytes (like potassium) blood levels, every 2 hours (up to 5 times)
- A 12-lead electrocardiogram will be repeated 4 hours after taking study drug if you are still in the emergency department

### **Day 1 (24 hours after taking study drug)**

When you depart the emergency department you will be given a packet of study drug powder to take with you. You will dissolve this powder in liquid and drink it 24 hours after you took the first dose of study drug, staff will explain what to do and they will give you the instructions in writing as well.

### **Day 2 follow up (48 hours after taking study drug)**

You will be asked to return for a follow up visit. You will be asked at what time you took the second dose of study drug, and blood will be collected to check your electrolytes levels.

### **Day 14 follow up**

Your study doctor will contact you or your family member by phone or may contact your regular doctor to check your health and discuss any health problems you may have had.



IRB Approved Template  
MUST BE APPROVED  
FOR SITES BEFORE USE  
Jun 18, 2020

## HOW MUCH BLOOD IS TAKEN DURING THE STUDY?

Blood samples will be collected during your stay in hospital as part of routine care, to allow your doctors to assess your medical status and make treatment decisions. In addition, blood samples will be taken for study-specific testing. The amount taken will not be more than 5 teaspoons.

## What are my responsibilities if I take part in this research?

If you agree to take part in this study, you must take the study treatment as instructed and do all study test and assessments. It is important that you follow the instructions from your study doctor. It is also important that you tell study staff about any other medicines, vitamins or herbal supplements you are taking before and during the study.

We do not know the effect of study drug on babies before they are born, or on nursing children. If you are female, you must not be pregnant or breast-feeding. Tell your study doctor if you are pregnant, are attempting to become pregnant or are breastfeeding. The randomization may take place before the result of the pregnancy test performed in this study is available. If the pregnancy test is positive you will discontinue treatment with study medication in the study. If you become pregnant during the study you should notify the study doctor right away.

You are not allowed to take part in any other research study while you are in this research study. If you have any health care contact such as with a doctor or a dentist, tell them that you re in this research study.

You should inform your study doctor or the study staff of any concerns you may have or any new health issues you may experience

## Could being in this research hurt me?

The study medication may cause side effects that we do not already know about. In previous studies people have had the side effects listed below. You may get none, some or all of these.

The most common side effects seen in clinical studies are:

- Constipation
- Hypomagnesemia (low magnesium level in blood)
- Diarrhea
- Nausea
- Abdominal discomfort
- Flatulence (passing gas)

It is also not possible to rule-out the chance of an allergic reaction to the study drug. Some symptoms of allergic reactions are mild (hives, itching) while others can be life-threatening (difficulty breathing, swelling of the throat), your study doctor will be closely watching your medical status for any side effects and will provide treatment as necessary.

In addition, there are risks associated with some of the tests performed for the study, however, many of these tests are routine and would be performed anyway as standard care for patients who have abnormal electrolyte levels.

Risks associated with drawing blood samples:

- Fainting, or feeling light-headed
- Pain at the site where the needle is placed
- Swelling and bruising at the site where the needle is placed
- Rarely, there may be a small blood clot or infection at the site of the needle puncture.

While taking vital signs, the blood pressure cuff may also cause discomfort or bruising to the upper arm.

It is very important that you tell the study doctor and the study staff about any side effects that you might experience. You may experience side effects or discomforts that are not listed on this form.

Another non-medical risk is loss of confidentiality of your health information. Confidentiality of your health information is described the section titled “What happens to the information collected for this research?”

Your study doctor will tell you of any information learned during the study, including changes that might cause you to change your mind about taking part in the study.

### **Will it cost me money to take part in this research?**

You will not be charged to take part in the study. The study drug and all study-specific test and medical checks required by the study are provided at no cost to you.

### **Will being in this research benefit me?**

You may not receive direct medical benefit from receiving the study drug. It is possible if you are assigned to receive the study drug, it may help your hyperkalemia, but this is not guaranteed.

Just by taking part in this research study, you may be helping future patients by providing important information about the study drug and by contributing to medical knowledge.

### **What other choices do I have besides taking part in this research?**

Your participation in this study is voluntary. Your alternative to taking part is not to participate. If you choose not to participate, you will still be able to receive standard care for your disease, your usual medical care will not change. You can speak with your doctor or other healthcare professional regarding options and alternatives for treatment.

IRB Approved Template  
MUST BE APPROVED  
FOR SITES BEFORE USE  
Jun 18, 2020

## What happens to the information collected for this research?

Unless required by law, your name will not be disclosed outside the research institution. Your name will be available only to the following people or agencies: the study staff, Institutional Review Boards (IRBs; groups that ensure the study is run properly), health authority inspectors such as the U.S. Food & Drug Administration, and CRA (study monitors; people that review the study data and documents). The above-mentioned individuals will use the personal information collected as part of this study, including your medical records (“Study Information”) to check that the study is conducted correctly and to ensure the accuracy of the study information. These people are all obligated to maintain confidentiality by the nature of their work, and are bound by confidentiality laws. If required, the study doctor may contact your personal doctor to collect additional medical information and your past medical history.

The study doctor may only share your study information with people whom you have permitted to see it.

While participating in this study, the study doctor will replace your name with a special code to be associated with your information and that will be used for all the entities working to complete, monitor, and manage this study. All Study Information will be kept confidential within the limits of the law. If the results of this study are published or presented, you will not be named, and nobody will be able to tell that you were in the study from the publication or presentation.

Your participation in this study is voluntary and you may cancel this consent at any time and without any reason. If you do withdraw from the study, your participation will end and study staff will stop collecting information from you. However, CRA will continue to retain and use any research results that have already been collected. If you have withdrawn from the study, for safety reasons you may be asked to complete a final study assessment visit.

If you have any questions about the collection and/or use of your information or would like to exercise rights that you may have regarding this information, you should ask the study staff. If you wish to leave the study, please inform the study staff.

A description of this clinical trial will be available on <http://www.ClinicalTrials.gov>, as required by U.S. Law. This Web site will not include information that can identify you. At most, the Web site will include a summary of the results. You can search this Web site at any time.

Data or specimens collected in this research will be de-identified and might be used for future research or distributed to another investigator for future research without your consent.

## Who can answer my questions about this research?

If you have questions, concerns, or complaints, or think this research has hurt you or made you sick, talk to the research team at the phone number listed above on the first page.

This research is being overseen by an Institutional Review Board (“IRB”). An IRB is a group of people who perform independent review of research studies. You may talk to them at (800) 562-4789, [help@wirb.com](mailto:help@wirb.com) if:

- You have questions, concerns, or complaints that are not being answered by the research team.
- You are not getting answers from the research team.
- You cannot reach the research team.
- You want to talk to someone else about the research.
- You have questions about your rights as a research subject.

### **What if I am injured because of taking part in this research?**

If you are injured or get sick because of being in this research, call the study team immediately. The study team will arrange for you to receive emergency medical treatment. Your insurance may be billed for this treatment. The sponsor will pay any charges that are not covered by insurance policy or the government, provided the injury was not due to your underlying illness or condition and was not caused by you or some other third party. No other payment is routinely available from the study staff or sponsor.

### **Can I be removed from this research without my approval?**

The study staff, CRA, FDA, or the IRB may also decide to remove you from the study at any time without your consent. The study staff may choose to take you out of the study because of unexpected or serious side effects, or for other scientific, technical, logistical, or safety considerations.

Examples of why you may be taken out of the study are:

- Staying in the study would be harmful to you
- You need treatment that is not allowed in this study
- You failed to follow study instructions
- You become pregnant
- The study is cancelled

We will tell you about any new information that may affect your health, welfare, or choice to stay in this research.

### **What happens if I agree to be in this research, but I change my mind later?**

Your participation in this study is strictly voluntary. You may refuse to take part in it, or you may stop participating at any time, even after signing this informed consent. There will be no penalty or loss of benefits to which you are otherwise entitled. However, if you decide to leave the study before it ends, the study staff will ask to see you before you are released from the study.

IRB Approved Template  
MUST BE APPROVED  
FOR SITES BEFORE USE  
Jun 18, 2020

1  
2  
3  
4  
5  
6 If you decide to leave the study, you should tell the study staff as soon as possible. They will  
7 make sure that proper procedures are followed, and a final visit is made for your safety.  
8

9  
10 **Will I be paid for taking part in this research?**

11 CRA will refund reasonable expenses including travel or parking that you incur because of this  
12 study.  
13

14 **DO I HAVE TO SIGN THIS HEALTH INFORMATION AUTHORIZATION?**

15 Yes, in order to participate in this study, you must authorize the release of your health  
16 information. If you do not agree, you cannot participate in this study.  
17  
18  
19  
20  
21  
22  
23  
24  
25  
26  
27  
28  
29  
30  
31  
32  
33  
34  
35  
36  
37  
38  
39  
40  
41  
42  
43  
44  
45  
46  
47  
48  
49  
50  
51  
52  
53  
54  
55  
56  
57  
58  
59  
60

IRB Approved Template  
 MUST BE APPROVED  
 FOR SITES BEFORE USE  
 Jun 18, 2020

**Statement of Consent:**

I have read this form and its contents were explained to me. I agree to be in this research study for the purposes listed above. All my questions were answered to my satisfaction. I will receive a signed and dated copy of this form for my records. I am not giving up any of my legal rights by signing this form.

\_\_\_\_\_  
 Signature of Research Subject able to consent      Date \_\_\_\_/\_\_\_\_/\_\_\_\_      Time \_\_\_\_:\_\_\_\_

\_\_\_\_\_  
 Printed Name of Research Subject

**STATEMENT OF PERSON EXPLAINING CONSENT**

I have carefully explained to the subject the nature and purpose of the above study. There has been an opportunity for the subject to ask questions about this research study. I have been and will be available to answer any questions the subject (or their family member) has about this study.

\_\_\_\_\_  
 Signature and Name of Person Explaining Consent      Date \_\_\_\_/\_\_\_\_/\_\_\_\_      Time \_\_\_\_:\_\_\_\_

**IMPARTIAL WITNESS**

If the person signing this consent form (Research Subject or their family member) is illiterate, an impartial witness must sign below. (Ideally, the witness should be selected by the subject or family member and should have no connection to the research team).

I have witnessed the accurate reading of the consent form to the research subject/ their family member, and the individual has had the opportunity to ask questions. I confirm the consent has been given freely.

\_\_\_\_\_  
 Signature of Impartial Witness      Date \_\_\_\_/\_\_\_\_/\_\_\_\_      Time \_\_\_\_:\_\_\_\_

\_\_\_\_\_  
 Printed Name of Impartial Witness

IRB Approved Template  
MUST BE APPROVED  
FOR SITES BEFORE USE  
Jun 18, 2020

## HIPAA Authorization Agreement Permission to Review, Use and Release Information about You

If you decide to be in this study, the study doctor and research team will use and share health data about you to conduct the study. Health data may include:

- Your name
- Address
- Phone number
- Date of birth
- Medical history
- Information from your study visits, including all test results

Health data may come from your study records or from existing records kept by your doctor or other health care workers.

For this study, the research team may share health data about you with authorized users. Authorized users may include:

- Representatives of Comprehensive Research Associates, including their affiliates and other vendors
- The Food and Drug Administration (FDA) and other US governmental agencies
- Governmental agencies of other countries
- The Institutional Review Board (IRB)
- Other authorized users

The Sponsor and those working for the Sponsor may use the health data sent to them:

- To see if the study drug works and is safe
- To compare the study drug to other drugs
- For other research activities related to the study drug

Once your health data has been shared with authorized users, it may no longer be protected by federal privacy laws and could be further shared without your permission.

This permission will be good until December 31, 2070.

1  
2  
3  
4  
5  
6  
7  
8 You may take back your permission to use and share health data about you at any  
9 time by writing to the study staff. If you do this, you will not be able to stay in this  
10 study. No new health data that identifies you will be gathered after your written  
11 request is received. However, health data about you that has already been gathered  
12 may still be used and given to others as described in this form.  
13  
14

15 Your right to access your health data in the study records will be suspended during  
16 the study to keep from changing the study results. When the study is over, you can  
17 access your study health data.  
18  
19

20  
21 If you decide not to sign this form, you will not be able to take part in the study.  
22  
23  
24  
25  
26  
27  
28  
29  
30  
31  
32  
33  
34  
35  
36  
37  
38  
39  
40  
41  
42  
43  
44  
45  
46  
47  
48  
49  
50  
51  
52  
53  
54  
55  
56  
57  
58  
59  
60



IRB Approved Template  
MUST BE APPROVED  
FOR SITES BEFORE USE  
Jun 18, 2020

## STATEMENT OF AUTHORIZATION

I have read this form and its contents were explained. My questions have been answered. I voluntarily agree to allow study staff to collect, use and share my health data as specified in this form. I will receive a signed and dated copy of this form for my records. I am not giving up any of my legal rights by signing this form.

\_\_\_\_\_  
Signature of Research Subject

\_\_\_\_/\_\_\_\_/\_\_\_\_ : \_\_\_\_  
Date Time

\_\_\_\_\_  
Printed Name of Research Subject

## STATEMENT OF PERSON EXPLAINING AUTHORIZATION

I have carefully explained to the subject the nature and purpose of this form. I have been and will be available to answer any questions the subject has about this form.

\_\_\_\_\_  
Printed Name of Person Explaining Authorization

\_\_\_\_\_  
Signature of Person Explaining Authorization

\_\_\_\_/\_\_\_\_/\_\_\_\_ : \_\_\_\_  
Date Time

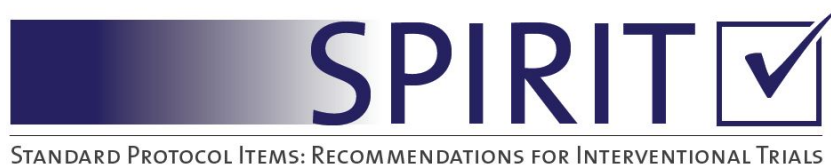

SPIRIT 2013 Checklist: Recommended items to address in a clinical trial protocol and related documents\*

| Section/item                      | ItemNo | Description                                                                                                                                                                                                                                                                              | Page(s)                                    |
|-----------------------------------|--------|------------------------------------------------------------------------------------------------------------------------------------------------------------------------------------------------------------------------------------------------------------------------------------------|--------------------------------------------|
| <b>Administrative information</b> |        |                                                                                                                                                                                                                                                                                          |                                            |
| Title                             | 1      | Descriptive title identifying the study design, population, interventions, and, if applicable, trial acronym                                                                                                                                                                             | Pg. 1, Lines 1–3                           |
| Trial registration                | 2a     | Trial identifier and registry name. If not yet registered, name of intended registry                                                                                                                                                                                                     | Pg. 4, Lines 61                            |
|                                   | 2b     | All items from the World Health Organization Trial Registration Data Set                                                                                                                                                                                                                 | N/A                                        |
| Protocol version                  | 3      | Date and version identifier                                                                                                                                                                                                                                                              | Pg. 15, Lines 292                          |
| Funding                           | 4      | Sources and types of financial, material, and other support                                                                                                                                                                                                                              | Pg. 20, Lines 353–364                      |
| Roles and responsibilities        | 5a     | Names, affiliations, and roles of protocol contributors                                                                                                                                                                                                                                  | Pg. 1, Lines 4–20<br>Pg. 21, Lines 376–389 |
|                                   | 5b     | Name and contact information for the trial sponsor                                                                                                                                                                                                                                       | Pg. 20, Lines 358–360                      |
|                                   | 5c     | Role of study sponsor and funders, if any, in study design; collection, management, analysis, and interpretation of data; writing of the report; and the decision to submit the report for publication, including whether they will have ultimate authority over any of these activities | Pg. 20, Lines 362–365                      |
|                                   | 5d     | Composition, roles, and responsibilities of the coordinating centre, steering committee, endpoint adjudication committee, data management team, and other individuals or groups overseeing the trial, if                                                                                 | Pg. 14–15, Lines 269–281                   |

|                                                           |     |                                                                                                                                                                                                           |                                             |
|-----------------------------------------------------------|-----|-----------------------------------------------------------------------------------------------------------------------------------------------------------------------------------------------------------|---------------------------------------------|
|                                                           |     | applicable (see Item 21a for data monitoring committee)                                                                                                                                                   |                                             |
| <b>Introduction</b>                                       |     |                                                                                                                                                                                                           |                                             |
| Background and rationale                                  | 6a  | Description of research question and justification for undertaking the trial, including summary of relevant studies (published and unpublished) examining benefits and harms for each intervention        | Pg. 5–6                                     |
|                                                           | 6b  | Explanation for choice of comparators                                                                                                                                                                     | Pg. 5, Lines 87–115<br>Pg. 6, Lines 118–120 |
| Objectives                                                | 7   | Specific objectives or hypotheses                                                                                                                                                                         | Pg. 6, Lines 116–124                        |
| Trial design                                              | 8   | Description of trial design including type of trial (eg, parallel group, crossover, factorial, single group), allocation ratio, and framework (eg, superiority, equivalence, noninferiority, exploratory) | Pg. 7, Lines 127–130 and Figure 1           |
| <b>Methods: Participants, interventions, and outcomes</b> |     |                                                                                                                                                                                                           |                                             |
| Study setting                                             | 9   | Description of study settings (eg, community clinic, academic hospital) and list of countries where data will be collected. Reference to where list of study sites can be obtained                        | Pg. 7, Lines 129 and Figure 2               |
| Eligibility criteria                                      | 10  | Inclusion and exclusion criteria for participants. If applicable, eligibility criteria for study centres and individuals who will perform the interventions (eg, surgeons, psychotherapists)              | Pg. 10, Lines 169–178                       |
| Interventions                                             | 11a | Interventions for each group with sufficient detail to allow replication, including how and when they will be administered                                                                                | Pg. 11–12, Lines 186–208                    |
|                                                           | 11b | Criteria for discontinuing or modifying allocated interventions for a given trial                                                                                                                         | Pg. 10, Lines 157–164                       |

|                      |     |                                                                                                                                                                                                                                                                                                                                                                                |                                                                |
|----------------------|-----|--------------------------------------------------------------------------------------------------------------------------------------------------------------------------------------------------------------------------------------------------------------------------------------------------------------------------------------------------------------------------------|----------------------------------------------------------------|
|                      |     | participant (eg, drug dose change in response to harms, participant request, or improving/worsening disease)                                                                                                                                                                                                                                                                   |                                                                |
|                      | 11c | Strategies to improve adherence to intervention protocols, and any procedures for monitoring adherence (eg, drug tablet return, laboratory tests)                                                                                                                                                                                                                              | N/A interventions administered in emergency department setting |
|                      | 11d | Relevant concomitant care and interventions that are permitted or prohibited during the trial                                                                                                                                                                                                                                                                                  | Pg. 10, Lines 157–164                                          |
| Outcomes             | 12  | Primary, secondary, and other outcomes, including the specific measurement variable (eg, systolic blood pressure), analysis metric (eg, change from baseline, final value, time to event), method of aggregation (eg, median, proportion), and time point for each outcome. Explanation of the clinical relevance of chosen efficacy and harm outcomes is strongly recommended | Pg. 12–13, Lines 211–233                                       |
| Participant timeline | 13  | Time schedule of enrolment, interventions (including any run-ins and washouts), assessments, and visits for participants. A schematic diagram is highly recommended (see Figure)                                                                                                                                                                                               | Table 1                                                        |
| Sample size          | 14  | Estimated number of participants needed to achieve study objectives and how it was determined, including clinical and statistical assumptions supporting any sample size calculations                                                                                                                                                                                          | Pg. 13, Lines 235–242                                          |
| Recruitment          | 15  | Strategies for achieving adequate participant                                                                                                                                                                                                                                                                                                                                  | Pg. 7, Lines 131–136                                           |

|                                                                     |     |                                                                                                                                                                                                                                                                                                                                                          |                          |
|---------------------------------------------------------------------|-----|----------------------------------------------------------------------------------------------------------------------------------------------------------------------------------------------------------------------------------------------------------------------------------------------------------------------------------------------------------|--------------------------|
|                                                                     |     | enrolment to reach target sample size                                                                                                                                                                                                                                                                                                                    |                          |
| <b>Methods: Assignment of interventions (for controlled trials)</b> |     |                                                                                                                                                                                                                                                                                                                                                          |                          |
| Allocation:                                                         |     |                                                                                                                                                                                                                                                                                                                                                          |                          |
| Sequence generation                                                 | 16a | Method of generating the allocation sequence (eg, computer-generated random numbers), and list of any factors for stratification. To reduce predictability of a random sequence, details of any planned restriction (eg, blocking) should be provided in a separate document that is unavailable to those who enrol participants or assign interventions | Pg. 10, Lines 190–191    |
| Allocation concealment mechanism                                    | 16b | Mechanism of implementing the allocation sequence (eg, central telephone; sequentially numbered, opaque, sealed envelopes), describing any steps to conceal the sequence until interventions are assigned                                                                                                                                                | Pg. 11, Lines 196–199    |
| Implementation                                                      | 16c | Who will generate the allocation sequence, who will enrol participants, and who will assign participants to interventions                                                                                                                                                                                                                                | Pg. 11, Lines 190–191    |
| Blinding (masking)                                                  | 17a | Who will be blinded after assignment to interventions (eg, trial participants, care providers, outcome assessors, data analysts), and how                                                                                                                                                                                                                | Pg. 11, Lines 196–199    |
|                                                                     | 17b | If blinded, circumstances under which unblinding is permissible, and procedure for revealing a participant's allocated intervention during the trial                                                                                                                                                                                                     | Pg. 11–12, Lines 199–204 |
| <b>Methods: Data collection, management, and analysis</b>           |     |                                                                                                                                                                                                                                                                                                                                                          |                          |
| Data collection methods                                             | 18a | Plans for assessment and collection of outcome, baseline, and other trial                                                                                                                                                                                                                                                                                | Pg. 13–14, Lines 243–267 |

|                            |     |                                                                                                                                                                                                                                                                                                                                    |                          |
|----------------------------|-----|------------------------------------------------------------------------------------------------------------------------------------------------------------------------------------------------------------------------------------------------------------------------------------------------------------------------------------|--------------------------|
|                            |     | data, including any related processes to promote data quality (eg, duplicate measurements, training of assessors) and a description of study instruments (eg, questionnaires, laboratory tests) along with their reliability and validity, if known. Reference to where data collection forms can be found, if not in the protocol |                          |
|                            | 18b | Plans to promote participant retention and complete follow-up, including list of any outcome data to be collected for participants who discontinue or deviate from intervention protocols                                                                                                                                          | Pg. 10, Lines 154–158    |
| Data management            | 19  | Plans for data entry, coding, security, and storage, including any related processes to promote data quality (eg, double data entry; range checks for data values). Reference to where details of data management procedures can be found, if not in the protocol                                                                  | Pg. 14–15, Lines 269–281 |
| Statistical methods        | 20a | Statistical methods for analysing primary and secondary outcomes. Reference to where other details of the statistical analysis plan can be found, if not in the protocol                                                                                                                                                           | Pg. 13–14, Lines 235–267 |
|                            | 20b | Methods for any additional analyses (eg, subgroup and adjusted analyses)                                                                                                                                                                                                                                                           | N/A                      |
|                            | 20c | Definition of analysis population relating to protocol non-adherence (eg, as randomised analysis), and any statistical methods to handle missing data (eg, multiple imputation)                                                                                                                                                    | Pg. 13, Lines 243–249    |
| <b>Methods: Monitoring</b> |     |                                                                                                                                                                                                                                                                                                                                    |                          |

|                                 |     |                                                                                                                                                                                                                                                                                                                                          |                       |
|---------------------------------|-----|------------------------------------------------------------------------------------------------------------------------------------------------------------------------------------------------------------------------------------------------------------------------------------------------------------------------------------------|-----------------------|
| Data monitoring                 | 21a | Composition of data monitoring committee (DMC); summary of its role and reporting structure; statement of whether it is independent from the sponsor and competing interests; and reference to where further details about its charter can be found, if not in the protocol.<br>Alternatively, an explanation of why a DMC is not needed | Pg. 14, Lines 270–271 |
|                                 | 21b | Description of any interim analyses and stopping guidelines, including who will have access to these interim results and make the final decision to terminate the trial                                                                                                                                                                  | N/A                   |
| Harms                           | 22  | Plans for collecting, assessing, reporting, and managing solicited and spontaneously reported adverse events and other unintended effects of trial interventions or trial conduct                                                                                                                                                        | Pg. 14, Lines 258–267 |
| Auditing                        | 23  | Frequency and procedures for auditing trial conduct, if any, and whether the process will be independent from investigators and the sponsor                                                                                                                                                                                              | Pg. 14, Lines 275–278 |
| <b>Ethics and dissemination</b> |     |                                                                                                                                                                                                                                                                                                                                          |                       |
| Research ethics approval        | 24  | Plans for seeking research ethics committee/institutional review board (REC/IRB) approval                                                                                                                                                                                                                                                | Pg. 15, Lines 284–298 |
| Protocol amendments             | 25  | Plans for communicating important protocol modifications (eg, changes to eligibility criteria, outcomes, analyses) to relevant parties (eg, investigators, REC/IRBs, trial participants, trial                                                                                                                                           | Pg. 15, Lines 294–295 |

|                               |     |                                                                                                                                                                                                                                                                                     |                          |
|-------------------------------|-----|-------------------------------------------------------------------------------------------------------------------------------------------------------------------------------------------------------------------------------------------------------------------------------------|--------------------------|
|                               |     | registries, journals, regulators)                                                                                                                                                                                                                                                   |                          |
| Consent or assent             | 26a | Who will obtain informed consent or assent from potential trial participants or authorised surrogates, and how (see Item 32)                                                                                                                                                        | Pg. 15, Lines 291–292    |
|                               | 26b | Additional consent provisions for collection and use of participant data and biological specimens in ancillary studies, if applicable                                                                                                                                               | N/A                      |
| Confidentiality               | 27  | How personal information about potential and enrolled participants will be collected, shared, and maintained in order to protect confidentiality before, during, and after the trial                                                                                                | Pg. 14, Lines 271–281    |
| Declaration of interests      | 28  | Financial and other competing interests for principal investigators for the overall trial and each study site                                                                                                                                                                       | Pg. 21–22, Lines 391–417 |
| Access to data                | 29  | Statement of who will have access to the final trial dataset, and disclosure of contractual agreements that limit such access for investigators                                                                                                                                     | Pg. 22, Lines 419–421    |
| Ancillary and post-trial care | 30  | Provisions, if any, for ancillary and post-trial care, and for compensation to those who suffer harm from trial participation                                                                                                                                                       | Pg. 10, Lines 165–167    |
| Dissemination policy          | 31a | Plans for investigators and sponsor to communicate trial results to participants, healthcare professionals, the public, and other relevant groups (eg, via publication, reporting in results databases, or other data sharing arrangements), including any publication restrictions | Pg. 15, Lines 295–300    |



|                            |     |                                                                                                                                                                                                |                                                 |
|----------------------------|-----|------------------------------------------------------------------------------------------------------------------------------------------------------------------------------------------------|-------------------------------------------------|
|                            | 31b | Authorship eligibility guideLines and any intended use of professional writers                                                                                                                 | Pg. 15, Lines 296–298                           |
|                            | 31c | Plans, if any, for granting public access to the full protocol, participant-level dataset, and statistical code                                                                                | Pg. 15, Lines 299–300                           |
| <b>Appendices</b>          |     |                                                                                                                                                                                                |                                                 |
| Informed consent materials | 32  | Model consent form and other related documentation given to participants and authorised surrogates                                                                                             | Consent form provided in supplementary appendix |
| Biological specimens       | 33  | Plans for collection, laboratory evaluation, and storage of biological specimens for genetic or molecular analysis in the current trial and for future use in ancillary studies, if applicable | N/A                                             |

\*It is strongly recommended that this checklist be read in conjunction with the SPIRIT 2013 Explanation & Elaboration for important clarification on the items. Amendments to the protocol should be tracked and dated. The SPIRIT checklist is copyrighted by the SPIRIT Group under the Creative Commons "[Attribution-NonCommercial-NoDerivs 3.0 Unported](https://creativecommons.org/licenses/by-nc-nd/3.0/)" license.
